# Supplementary material for: Sesquiterpenes from Streptomyces qinglanensis and Their Cytotoxic Activity
Source: MDPI journal article supplement (doi:10.3390/md21060361), 2023-06-16
Supplement: s1 [file s1]

# Sesquiterpenes from *Streptomyces qinglanensis* and Their Cytotoxic Activity

|                                                                                            |    |
|--------------------------------------------------------------------------------------------|----|
| <b>Figure S1.</b> <sup>1</sup> H NMR spectrum of <b>1</b> .....                            | 3  |
| <b>Figure S2.</b> <sup>13</sup> C NMR spectrum of <b>1</b> .....                           | 4  |
| <b>Figure S3.</b> HSQC spectrum of <b>1</b> . ....                                         | 5  |
| <b>Figure S4.</b> <sup>1</sup> H- <sup>1</sup> H COSY spectrum of <b>1</b> .....           | 6  |
| <b>Figure S5.</b> HMBC spectrum of <b>1</b> . ....                                         | 7  |
| <b>Figure S6.</b> NOESY spectrum of <b>1</b> .....                                         | 8  |
| <b>Figure S7.</b> HRESI MS data of <b>1</b> .....                                          | 9  |
| <b>Figure S8.</b> Comparison of chemical shifts of <b>4</b> and <b>6</b> . ....            | 10 |
| <b>Figure S9.</b> <sup>1</sup> H NMR spectrum of <b>4</b> .....                            | 11 |
| <b>Figure S10.</b> <sup>13</sup> C NMR spectrum of <b>4</b> .....                          | 12 |
| <b>Figure S11.</b> HSQC spectrum of <b>4</b> . ....                                        | 13 |
| <b>Figure S12.</b> <sup>1</sup> H- <sup>1</sup> H COSY spectrum of <b>4</b> .....          | 14 |
| <b>Figure S13.</b> HMBC spectrum of <b>4</b> . ....                                        | 15 |
| <b>Figure S14.</b> 1D selective NOESY spectrum of <b>4</b> (irradiated at H-8). ....       | 16 |
| <b>Figure S15.</b> 1D selective NOESY spectrum of <b>4</b> (irradiated at H-5). ....       | 17 |
| <b>Figure S16.</b> HRESIMS data of <b>4</b> .....                                          | 18 |
| <b>Figure S17.</b> <sup>1</sup> H NMR spectrum of <b>7</b> .....                           | 19 |
| <b>Figure S18.</b> <sup>13</sup> C NMR spectrum of <b>7</b> .....                          | 20 |
| <b>Figure S19.</b> HSQC spectrum of <b>7</b> . ....                                        | 21 |
| <b>Figure S 20.</b> <sup>1</sup> H- <sup>1</sup> H COSY spectrum of <b>7</b> .....         | 22 |
| <b>Figure S21.</b> HMBC spectrum of <b>7</b> . ....                                        | 23 |
| <b>Figure S22.</b> NOESY spectrum of <b>7</b> .....                                        | 24 |
| <b>Figure S23.</b> 1D selective NOESY spectrum of <b>7</b> (irradiated at H-5). ....       | 25 |
| <b>Figure S24.</b> HRESIMS data of <b>7</b> .....                                          | 26 |
| <b>Figure S25.</b> Comparison NMR data of bolinane A ( <b>9</b> ) with bolinaquinone. .... | 27 |
| <b>Figure S26.</b> <sup>1</sup> H NMR spectrum of <b>9</b> .....                           | 28 |

|                                                                                                              |    |
|--------------------------------------------------------------------------------------------------------------|----|
| <b>Figure S27.</b> $^{13}\text{C}$ NMR spectrum of <b>9</b> .....                                            | 29 |
| <b>Figure S28.</b> HSQC spectrum of <b>9</b> . ....                                                          | 30 |
| <b>Figure S29.</b> $^1\text{H}$ - $^1\text{H}$ COSY spectrum of <b>9</b> .....                               | 31 |
| <b>Figure S30.</b> HMBC spectrum of <b>9</b> . ....                                                          | 32 |
| <b>Figure S31.</b> Selective 1D NOESY spectrum of <b>9</b> (irradiated at $\text{H}_3$ -12). ....            | 33 |
| <b>Figure S32.</b> Selective 1D NOESY spectrum of <b>9</b> (irradiated at $\text{H}_3$ -14). ....            | 34 |
| <b>Figure S33.</b> Selective 1D NOESY spectrum of <b>9</b> (irradiated at $\text{H}_3$ -13). ....            | 35 |
| <b>Figure S34.</b> HRESIMS data of <b>9</b> .....                                                            | 36 |
| <b>Figure S35.</b> Results of the cytotoxicity test of <b>1-9</b> against six solid cancer cell lines. ....  | 39 |
| <b>Figure S36.</b> Results of the cytotoxicity test of <b>1-9</b> against seven blood cancer cell lines..... | 43 |

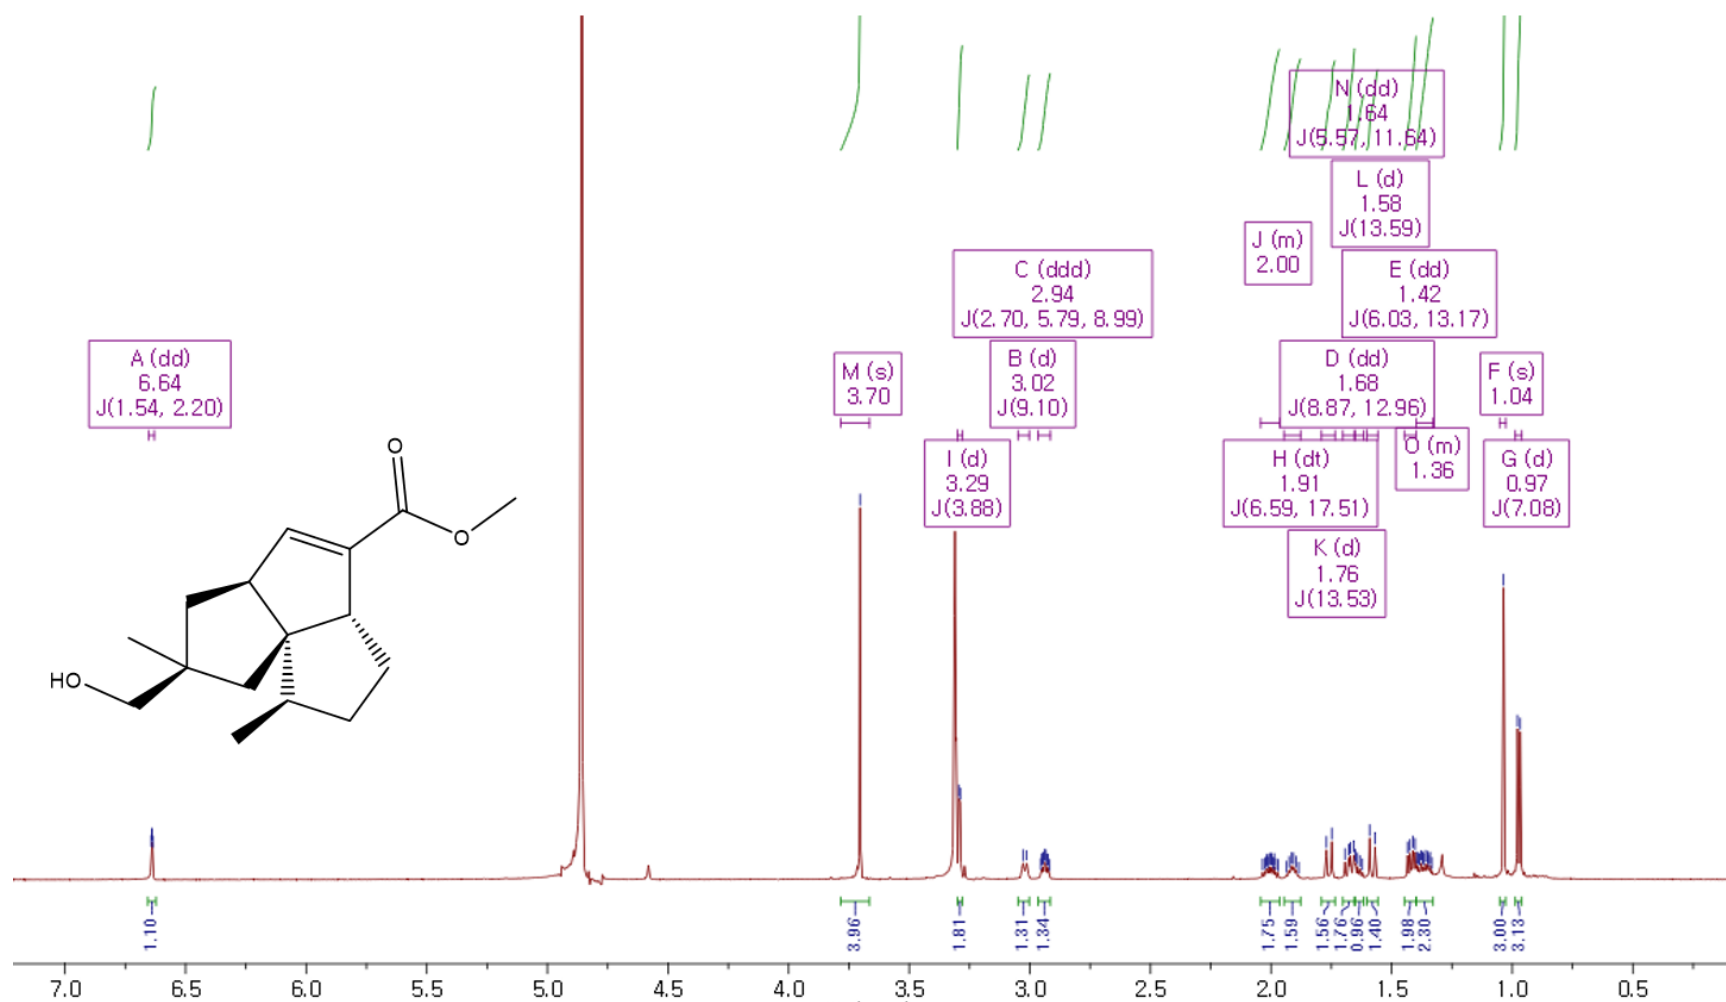

**Figure S1.** <sup>1</sup>H NMR spectrum of **1**.

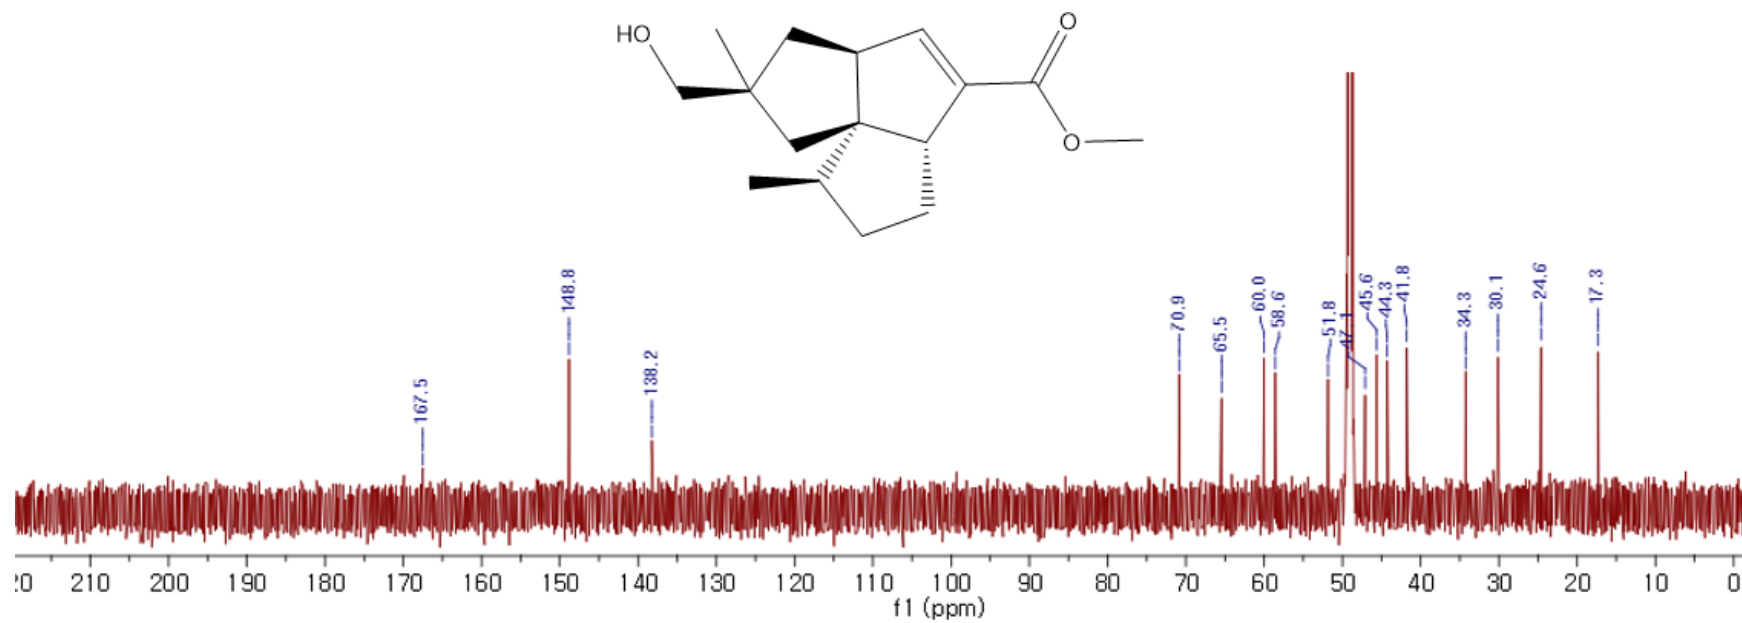

**Figure S2.**  $^{13}\text{C}$  NMR spectrum of **1**.

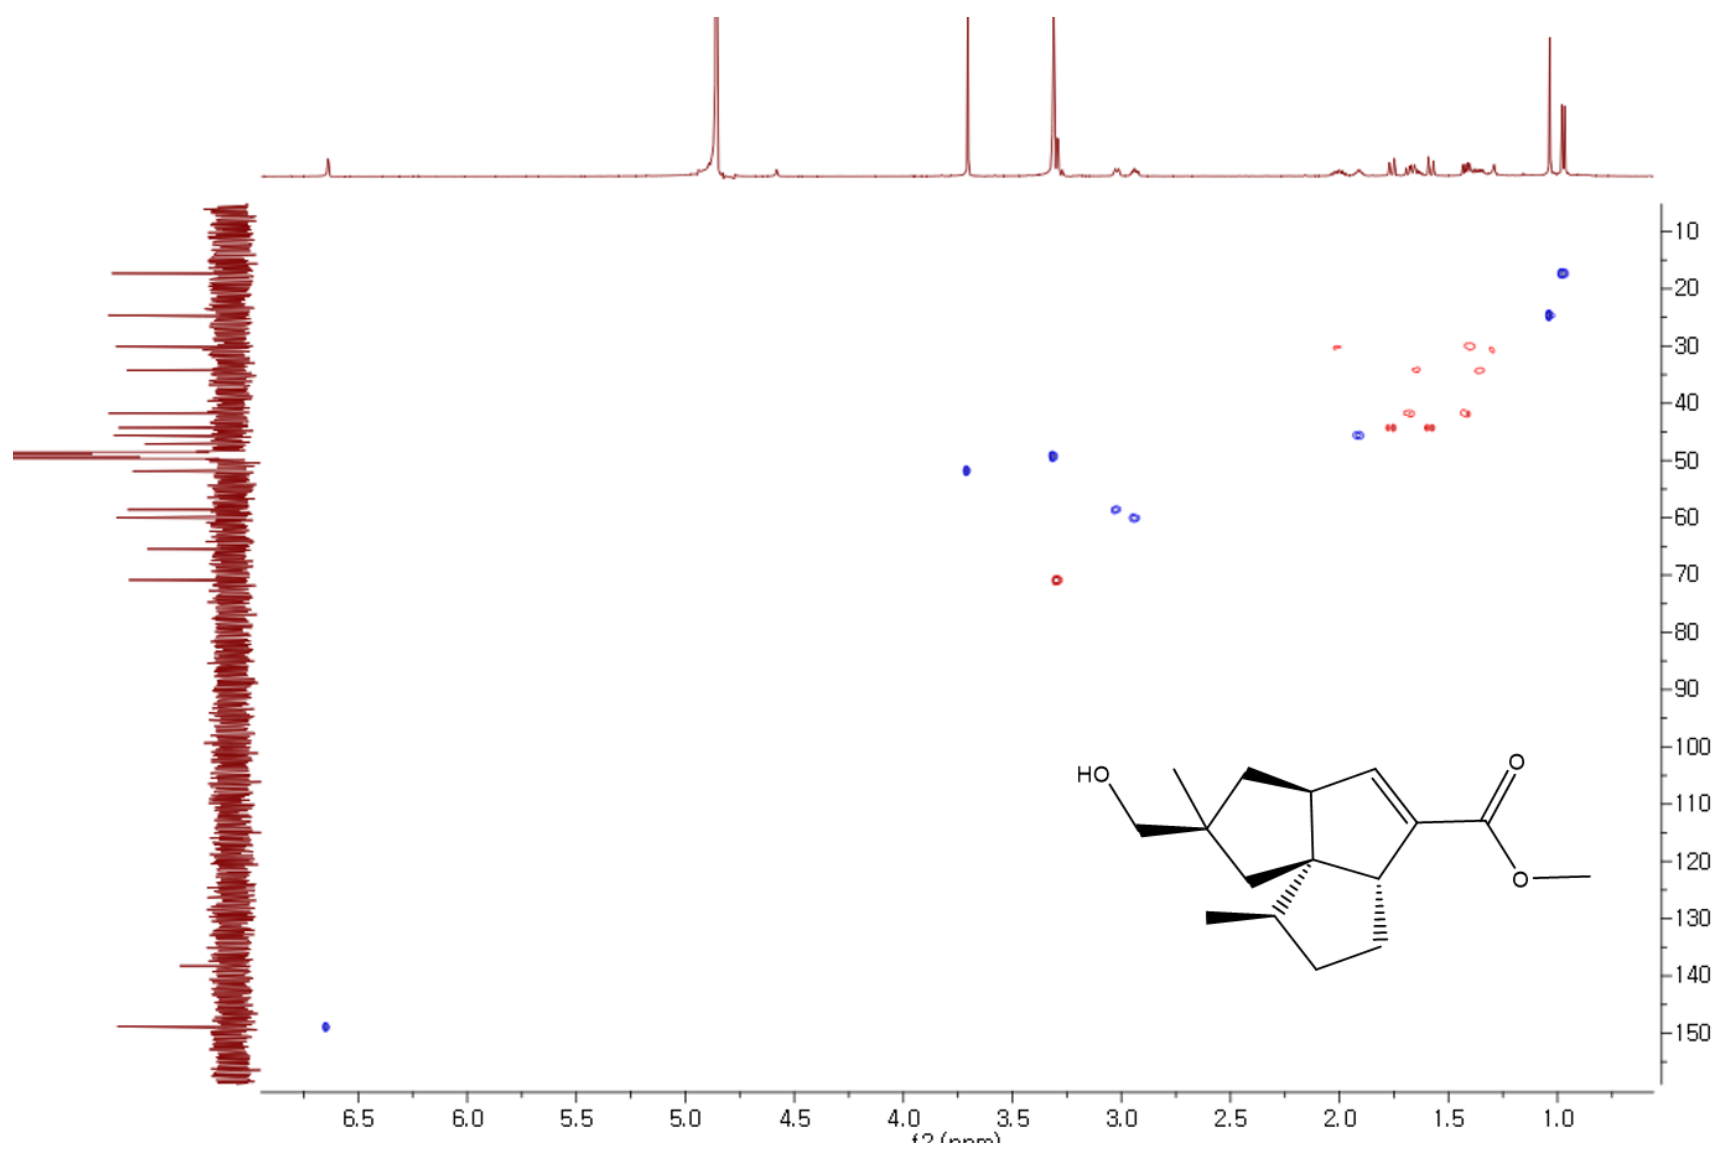

**Figure S3.** HSQC spectrum of **1**.

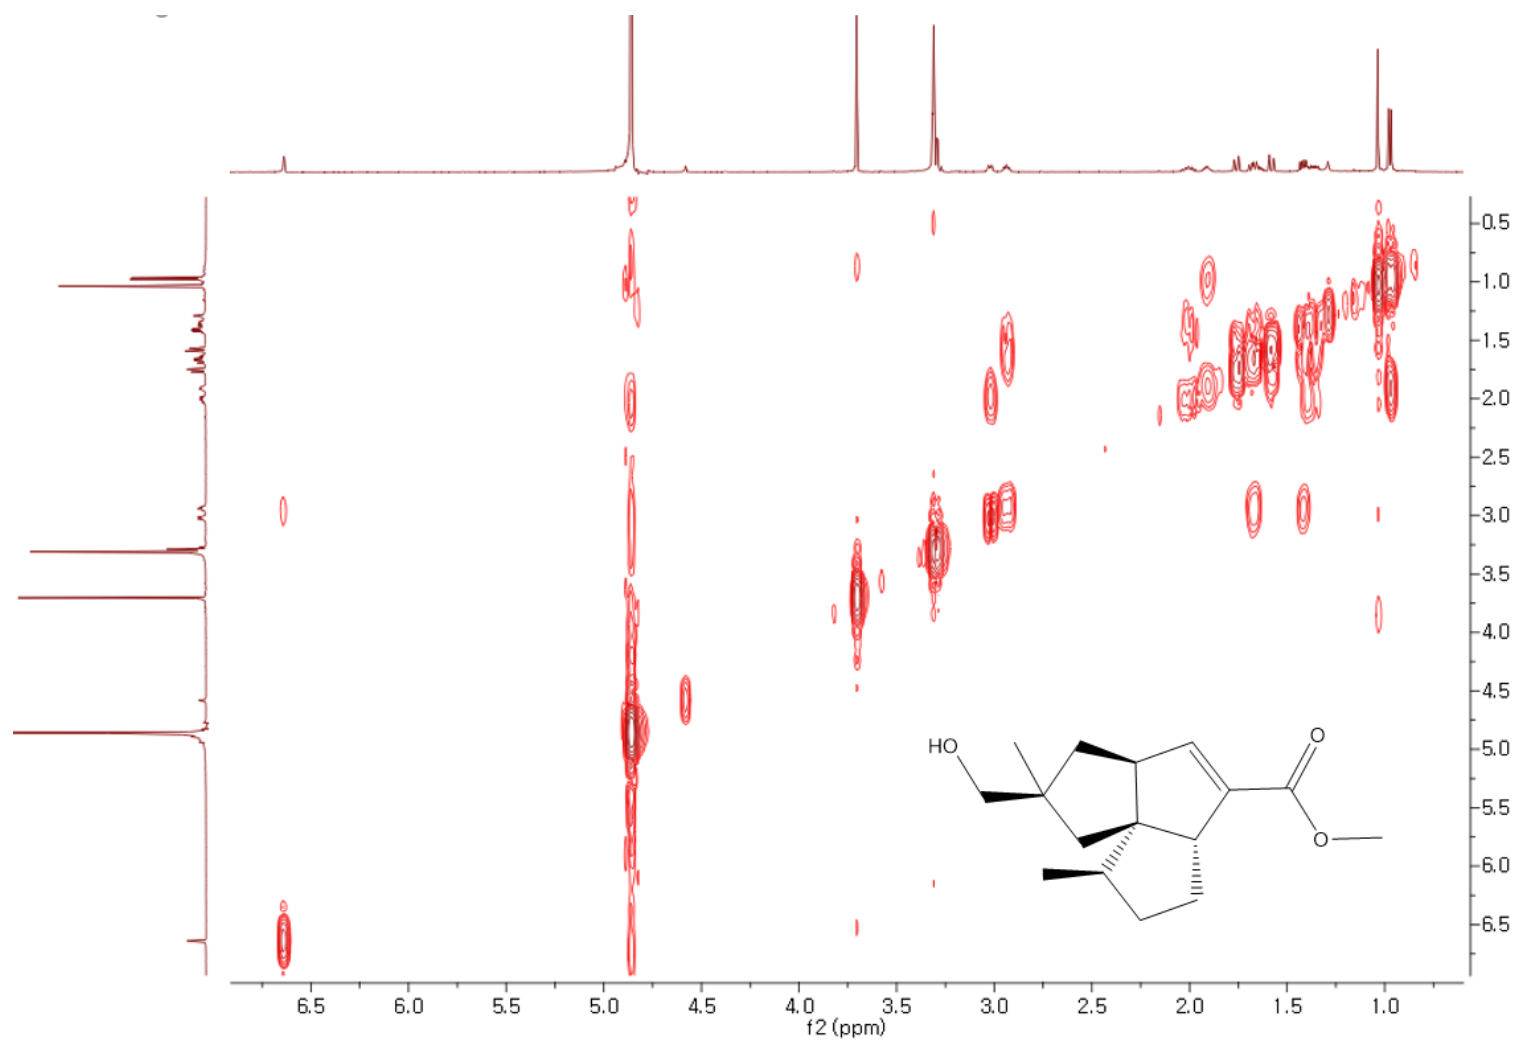

**Figure S4.**  $^1\text{H}$ - $^1\text{H}$  COSY spectrum of **1**.

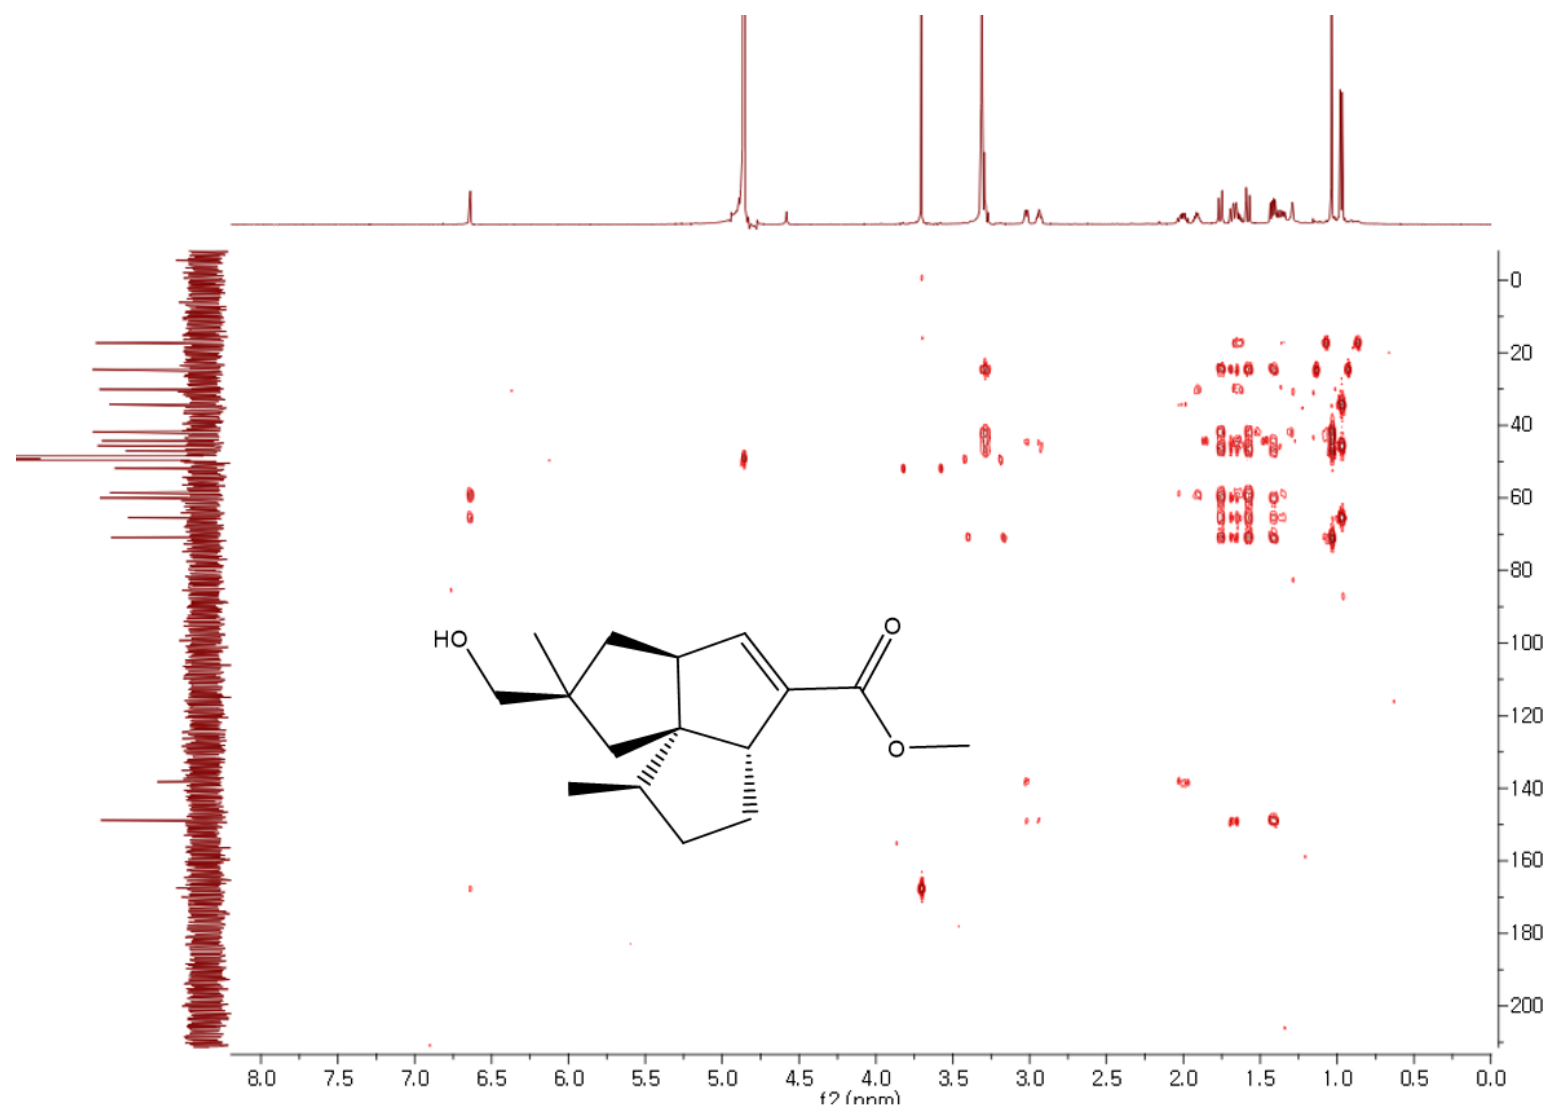

**Figure S5.** HMBC spectrum of **1**.

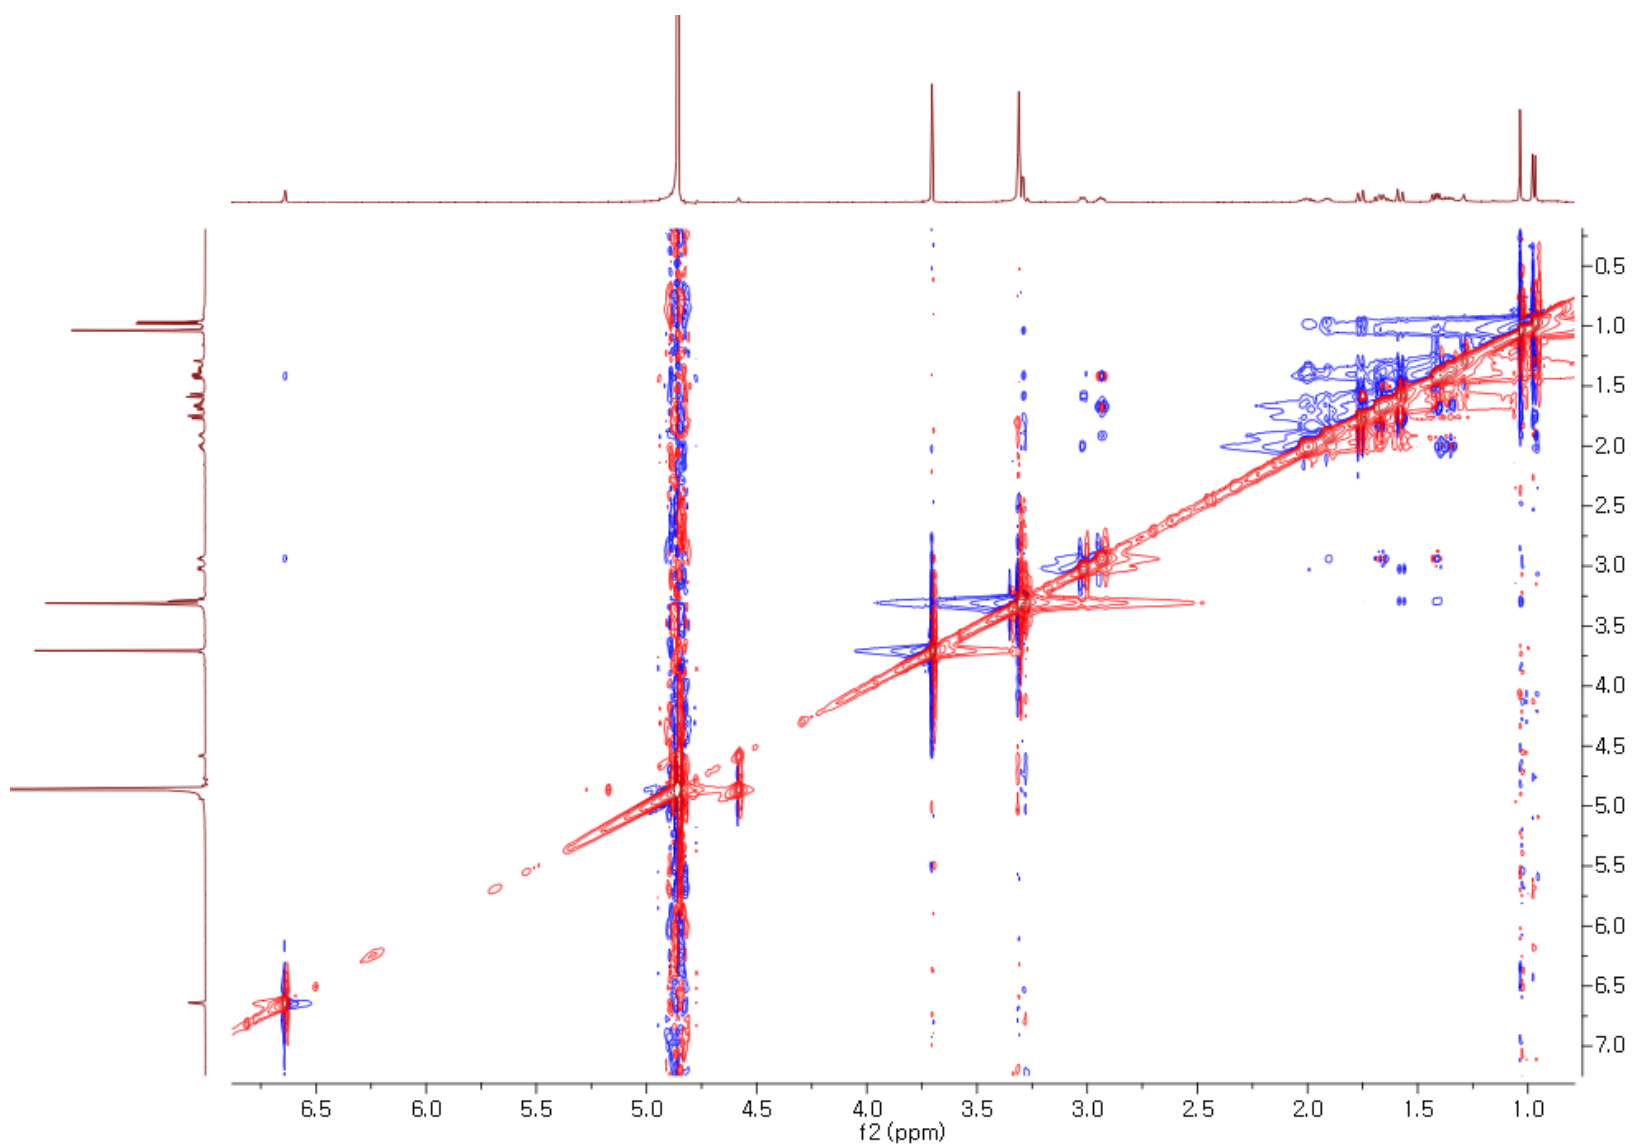

**Figure S6.** NOESY spectrum of **1**.



20210720\_02\_A21-20\_KOST\_HRP\_1.21 (0.433) AM2 (Ar, 30000.0, 0.00, 0.00); ABS

1: TOF MS ES+  
1.30e6

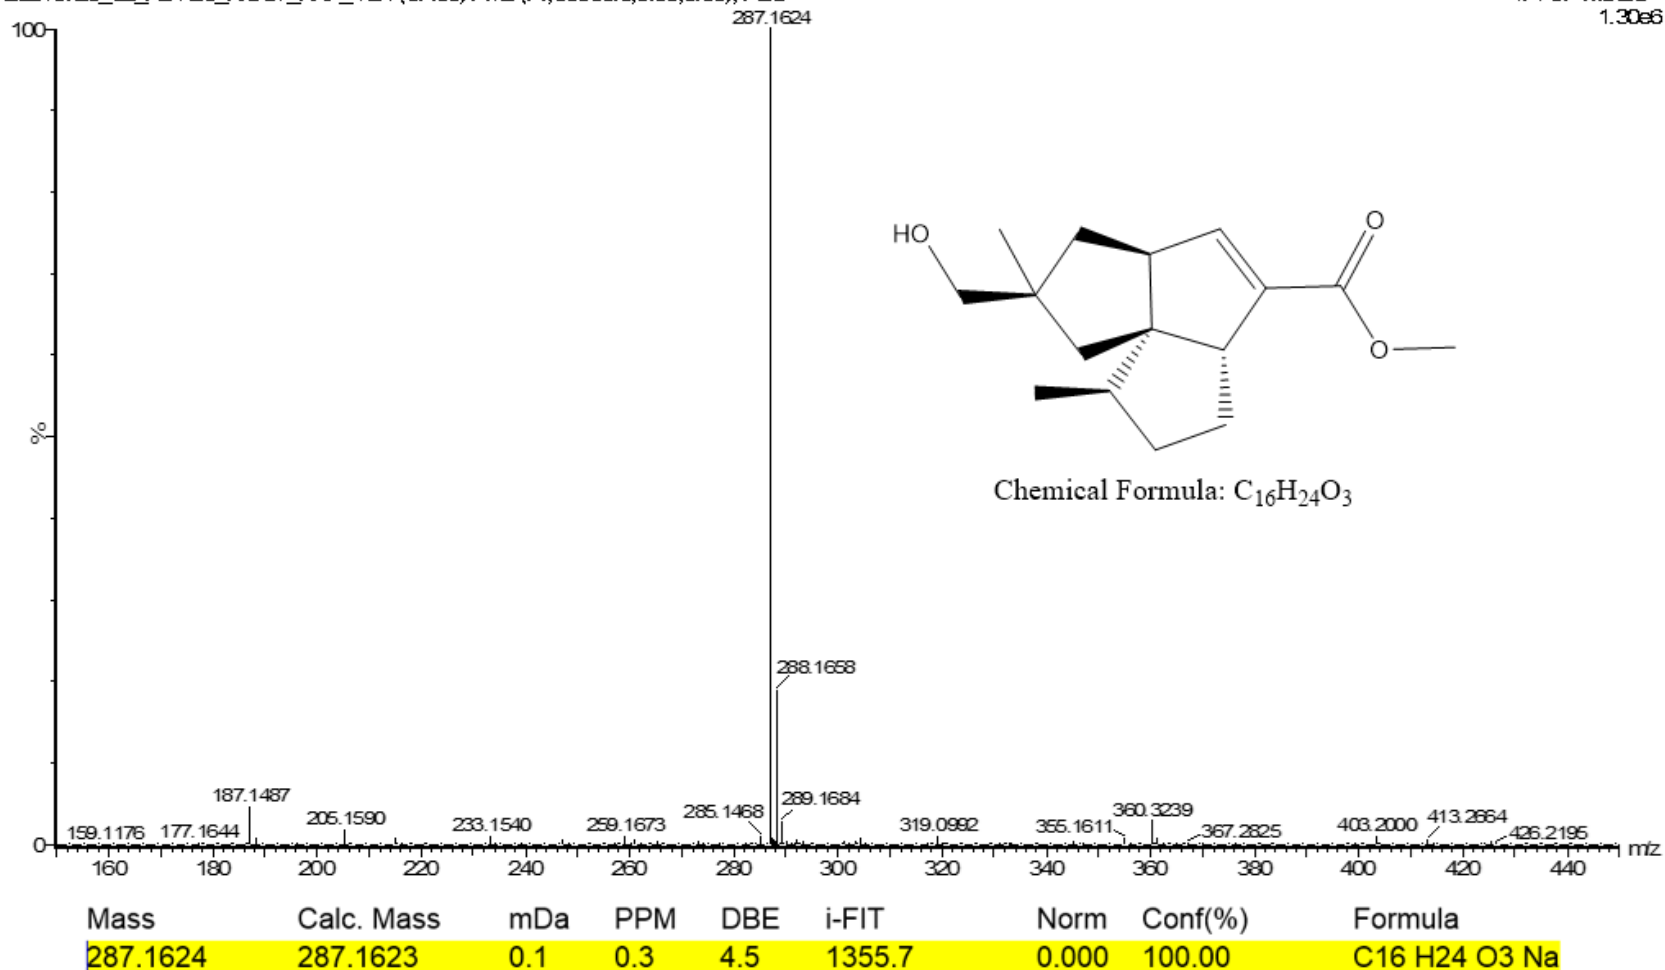

**Figure S7.** HRESI MS data of **1**.

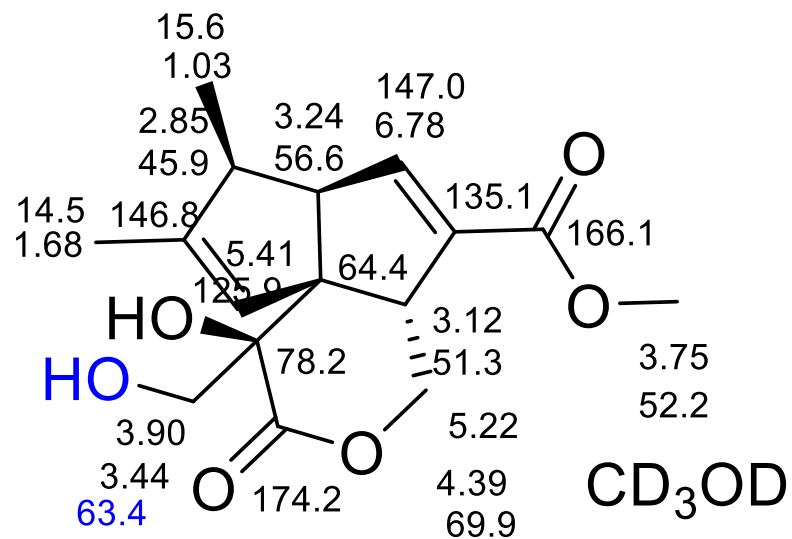

**4**

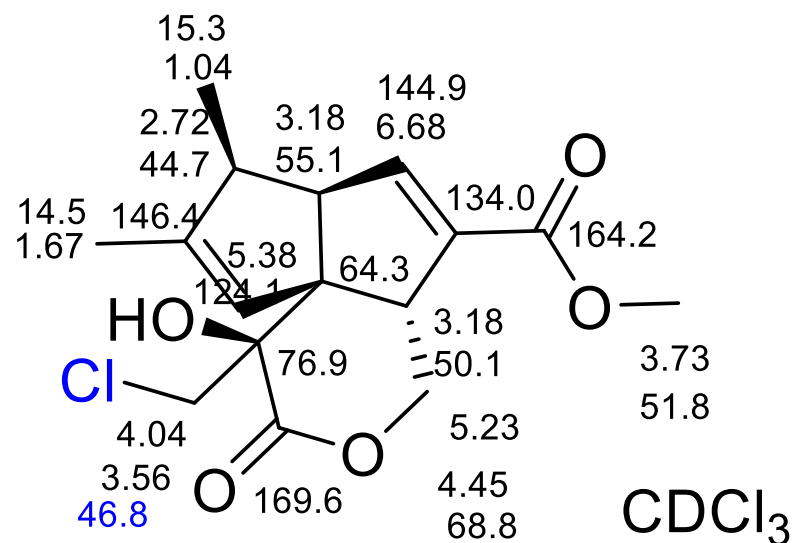

AA-57 methyl ester (**6**)

*J Antibiot* (Tokyo). **1978** Jul; 31 (7) : 729-31.  
doi: 10.7164/antibiotics.31.729.

**Figure S8.** Comparison of chemical shifts of **4** and **6**.

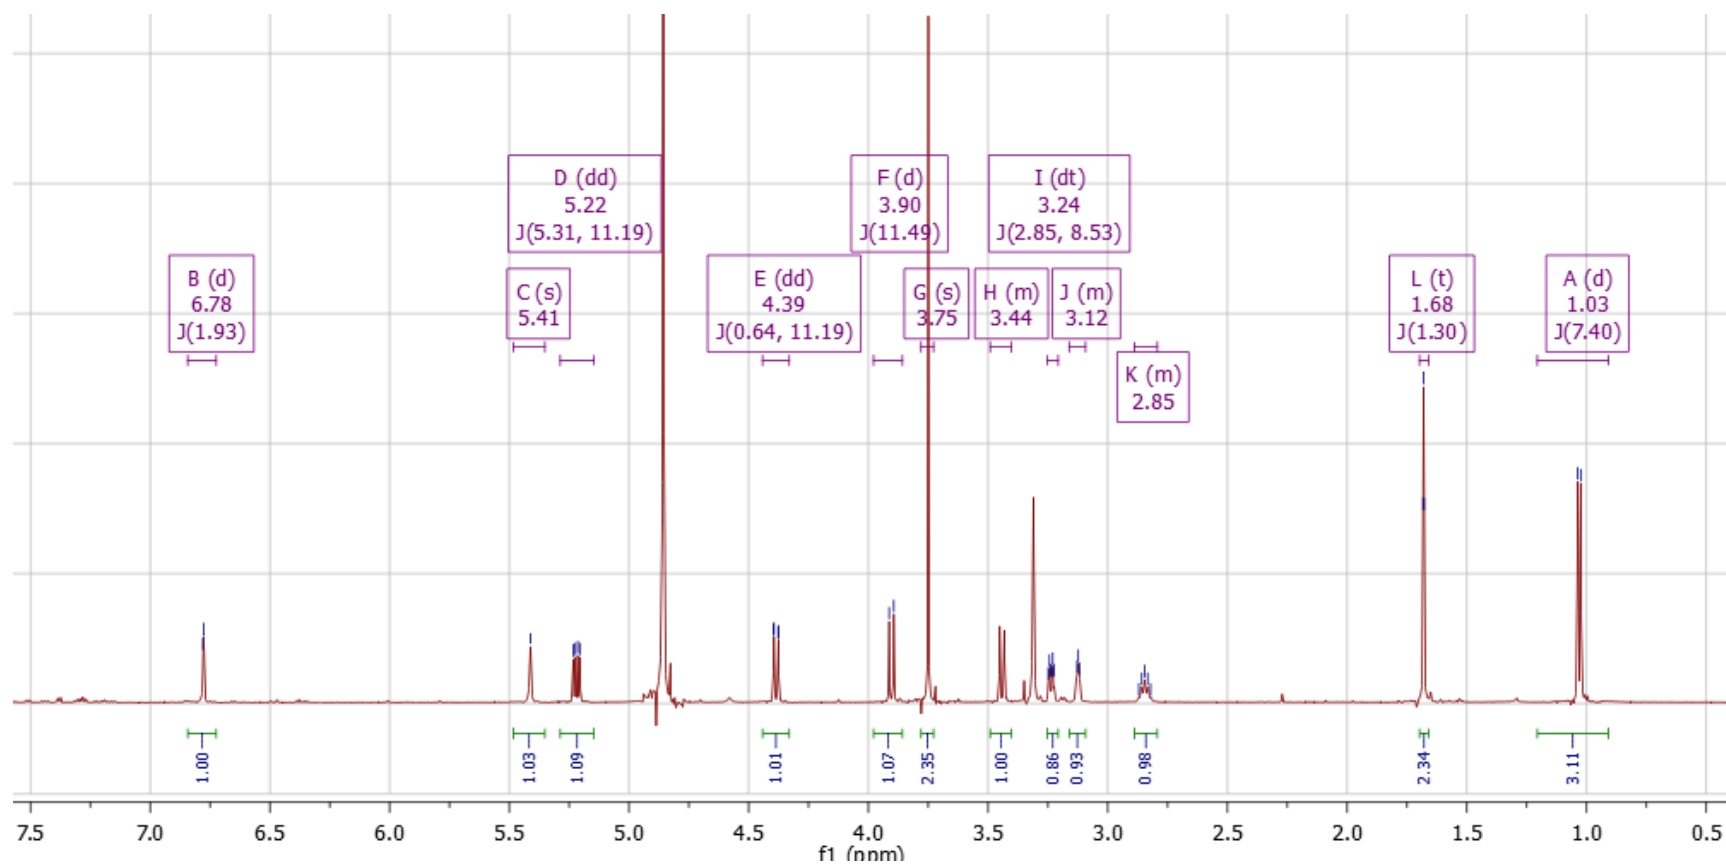

**Figure S9.**  $^1\text{H}$  NMR spectrum of **4**.

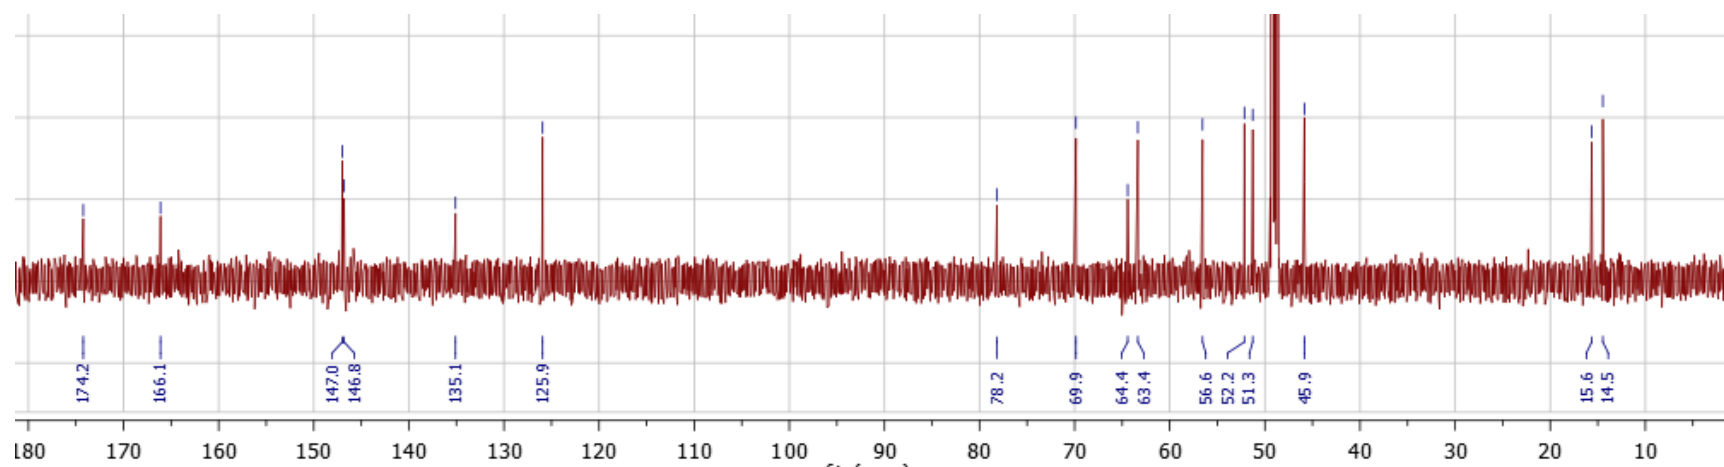

**Figure S10.** <sup>13</sup>C NMR spectrum of **4**.

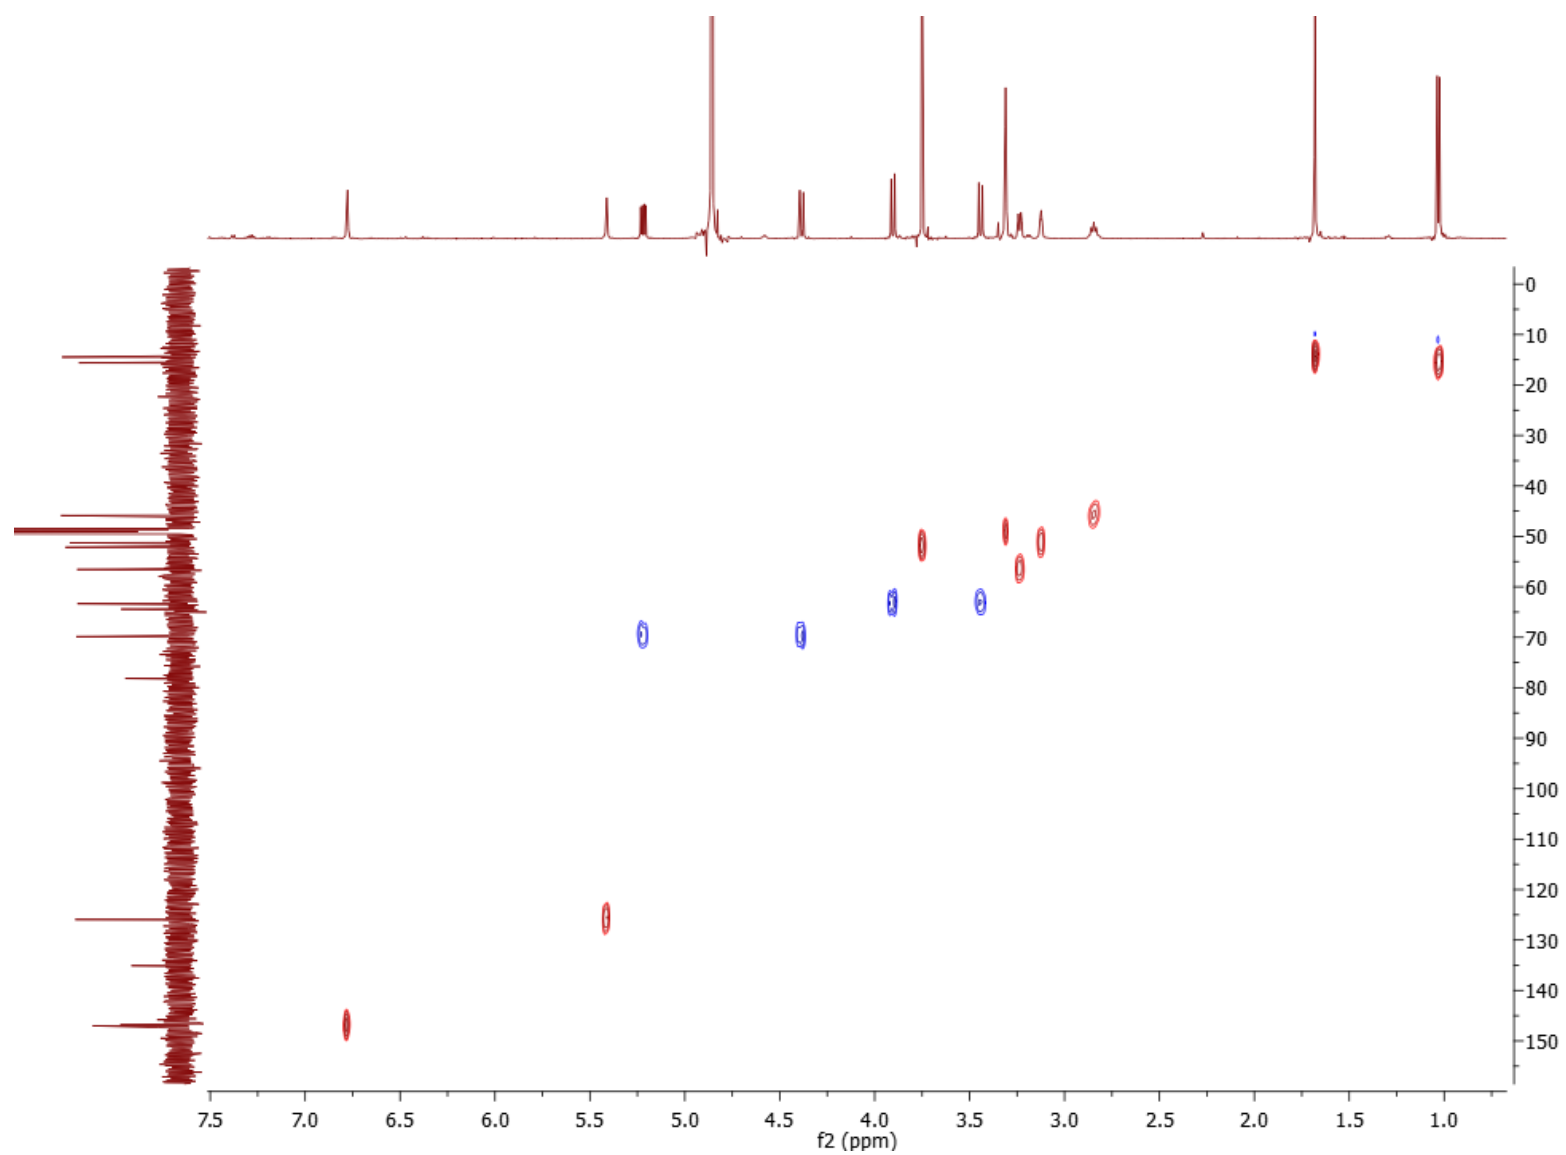

**Figure S11.** HSQC spectrum of **4**.

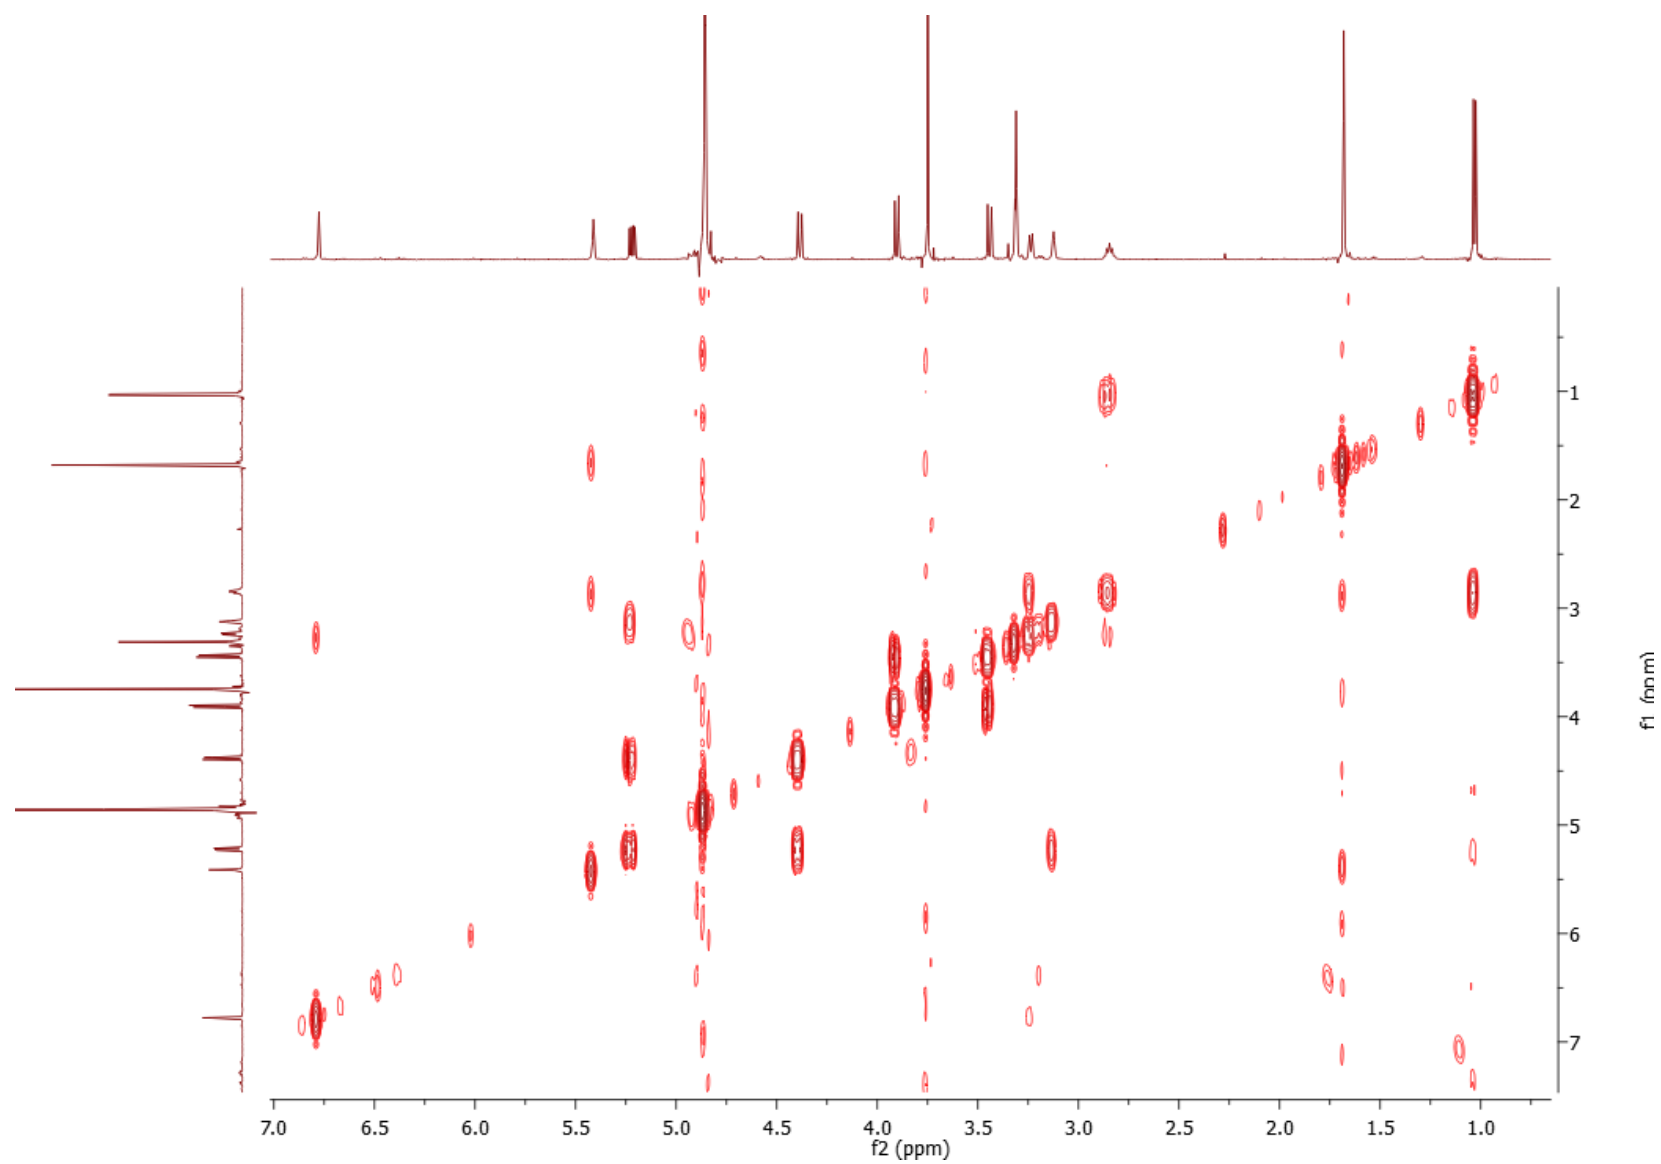

**Figure S12.**  $^1\text{H}$ - $^1\text{H}$  COSY spectrum of **4**.

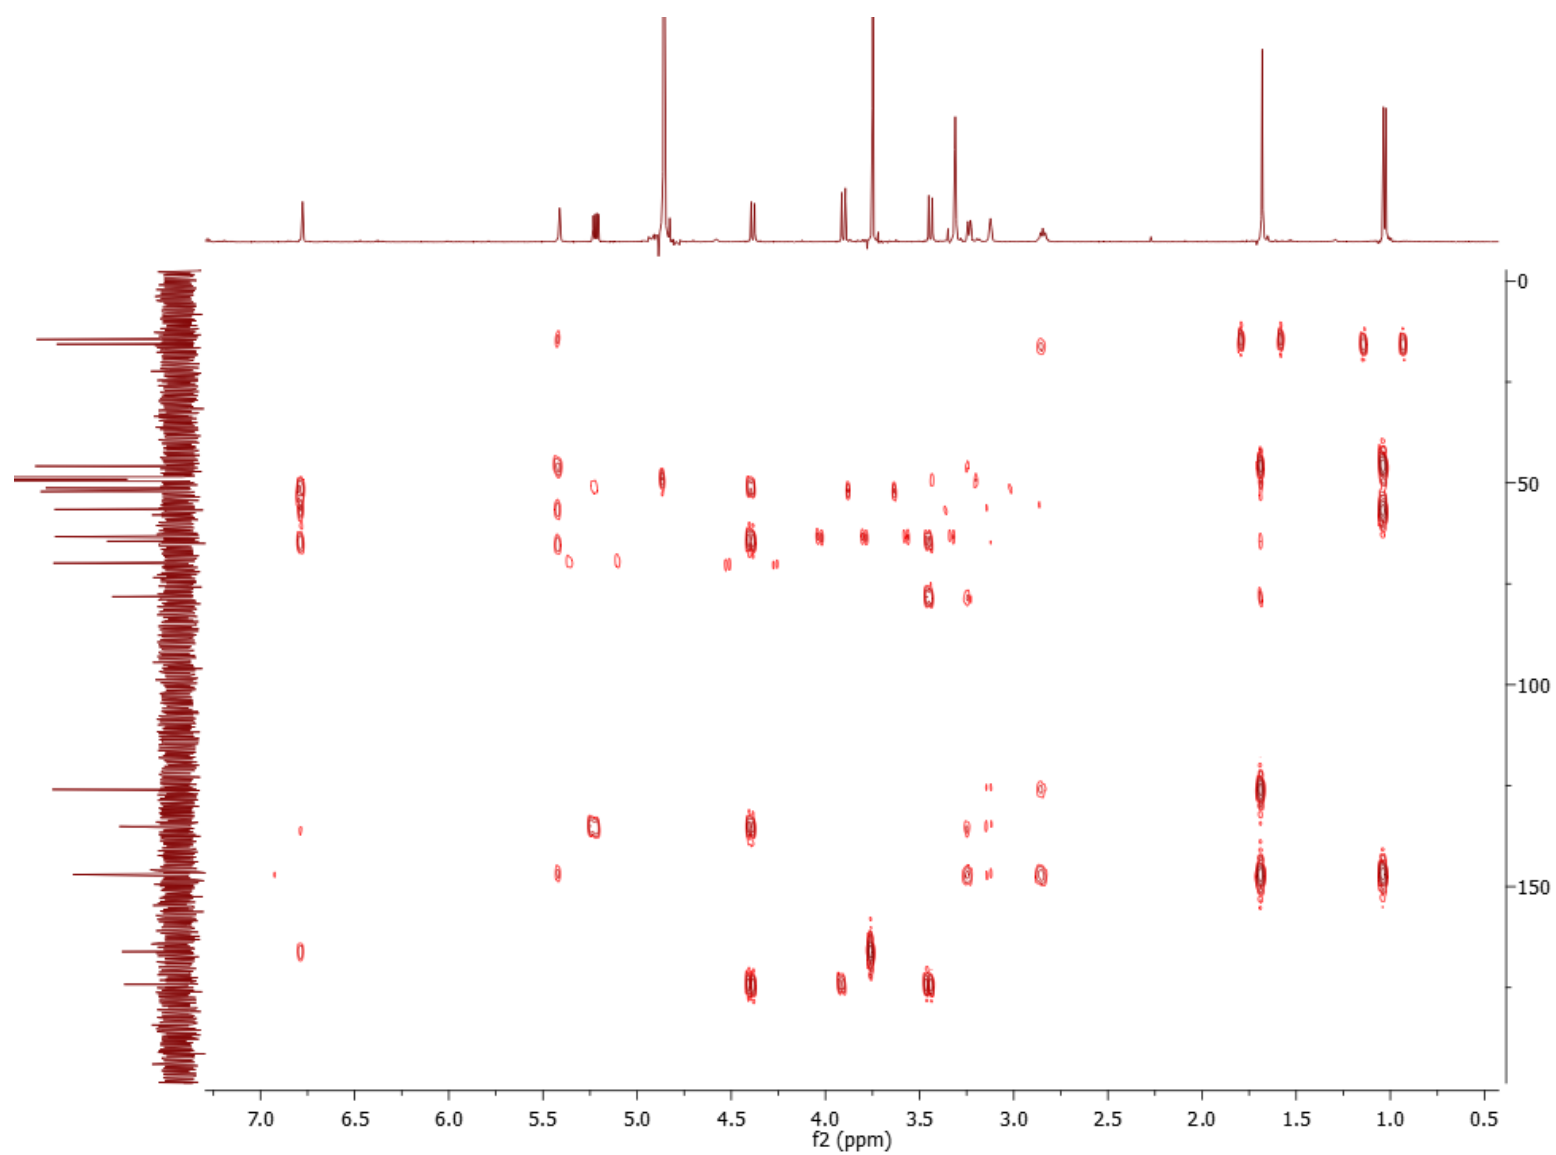

**Figure S13.** HMBC spectrum of **4**.

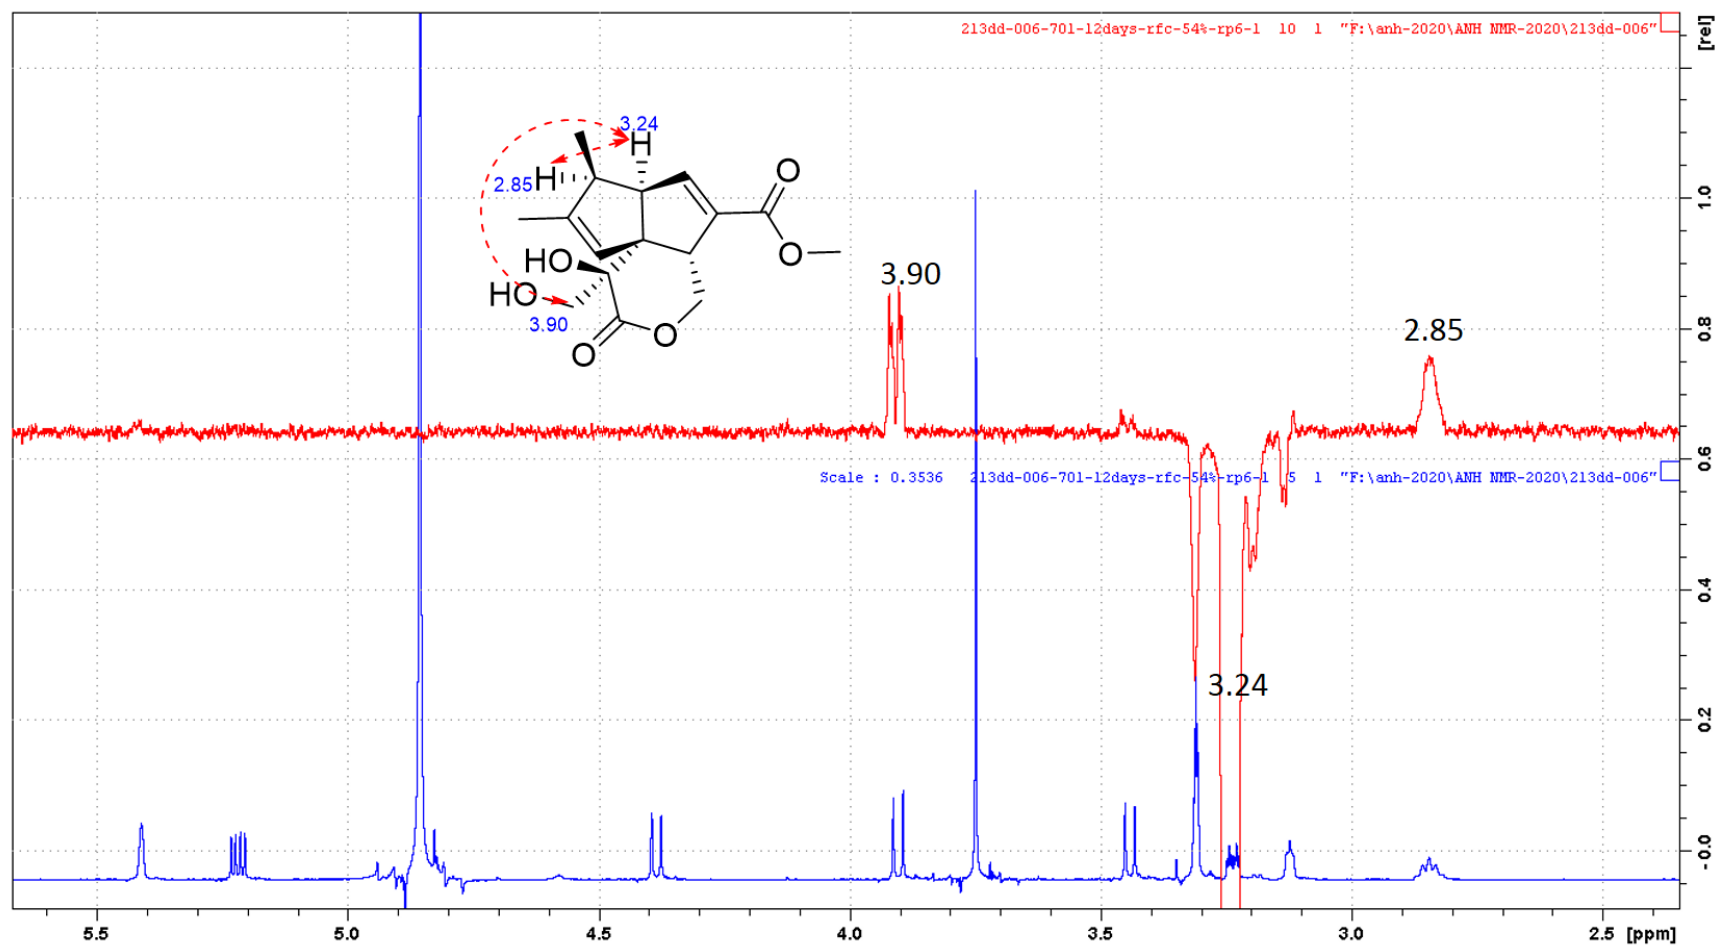

**Figure S14.** 1D selective NOESY spectrum of **4** (irradiated at H-8).



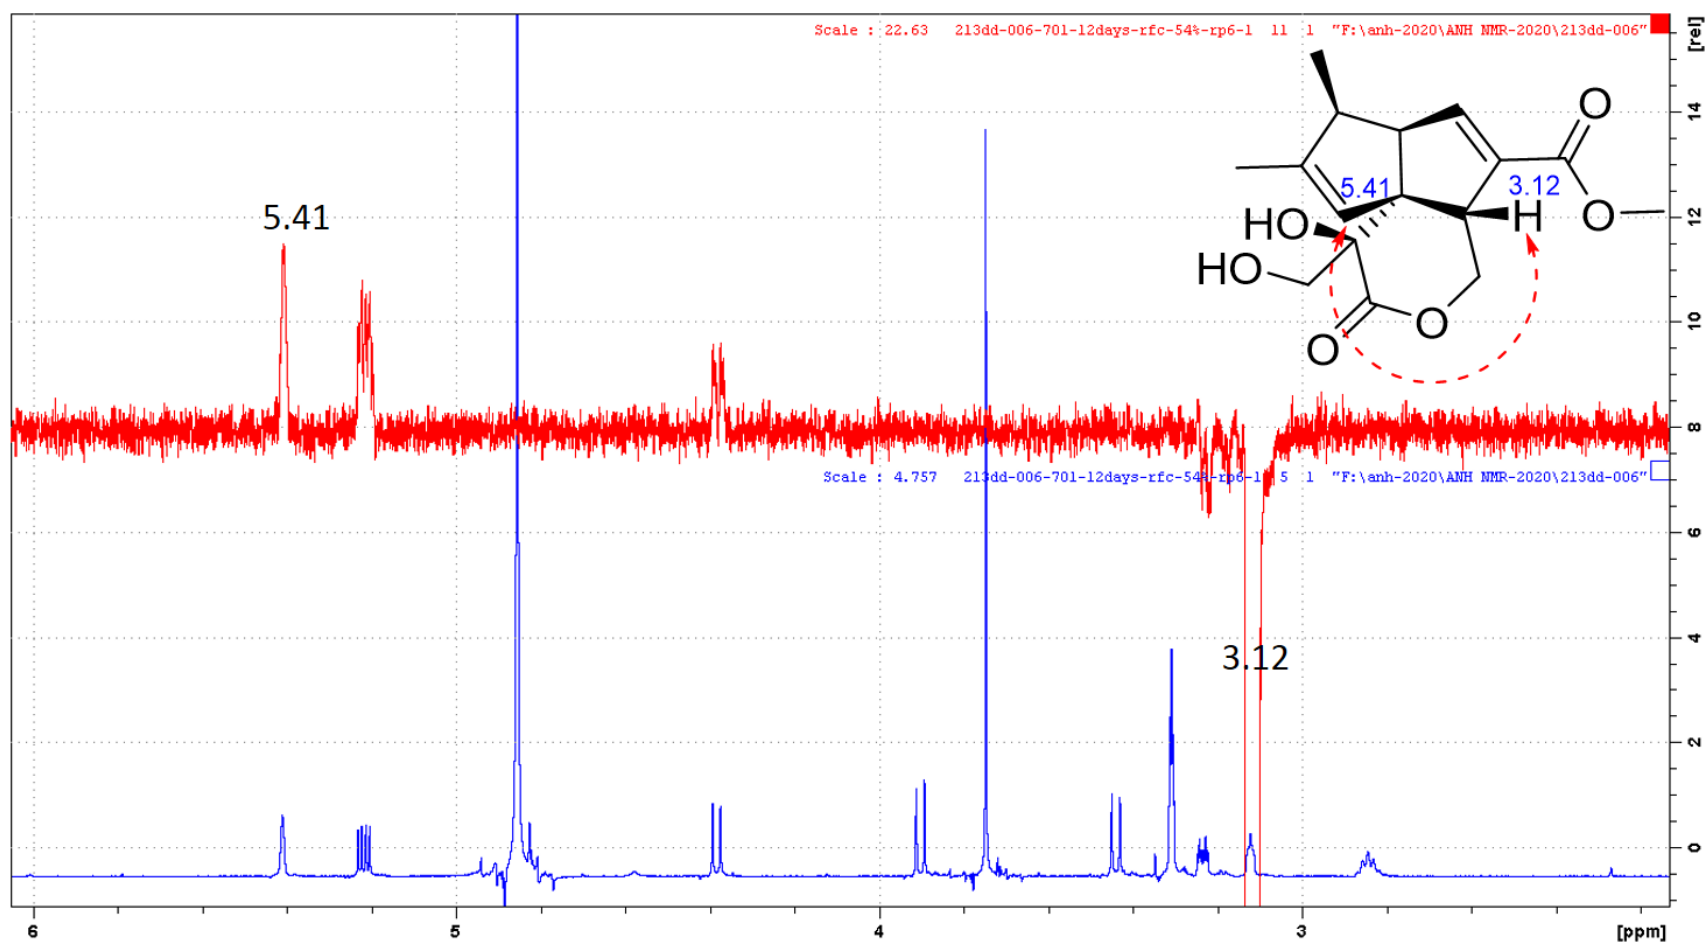

**Figure S15.** 1D selective NOESY spectrum of **4** (irradiated at H-5).

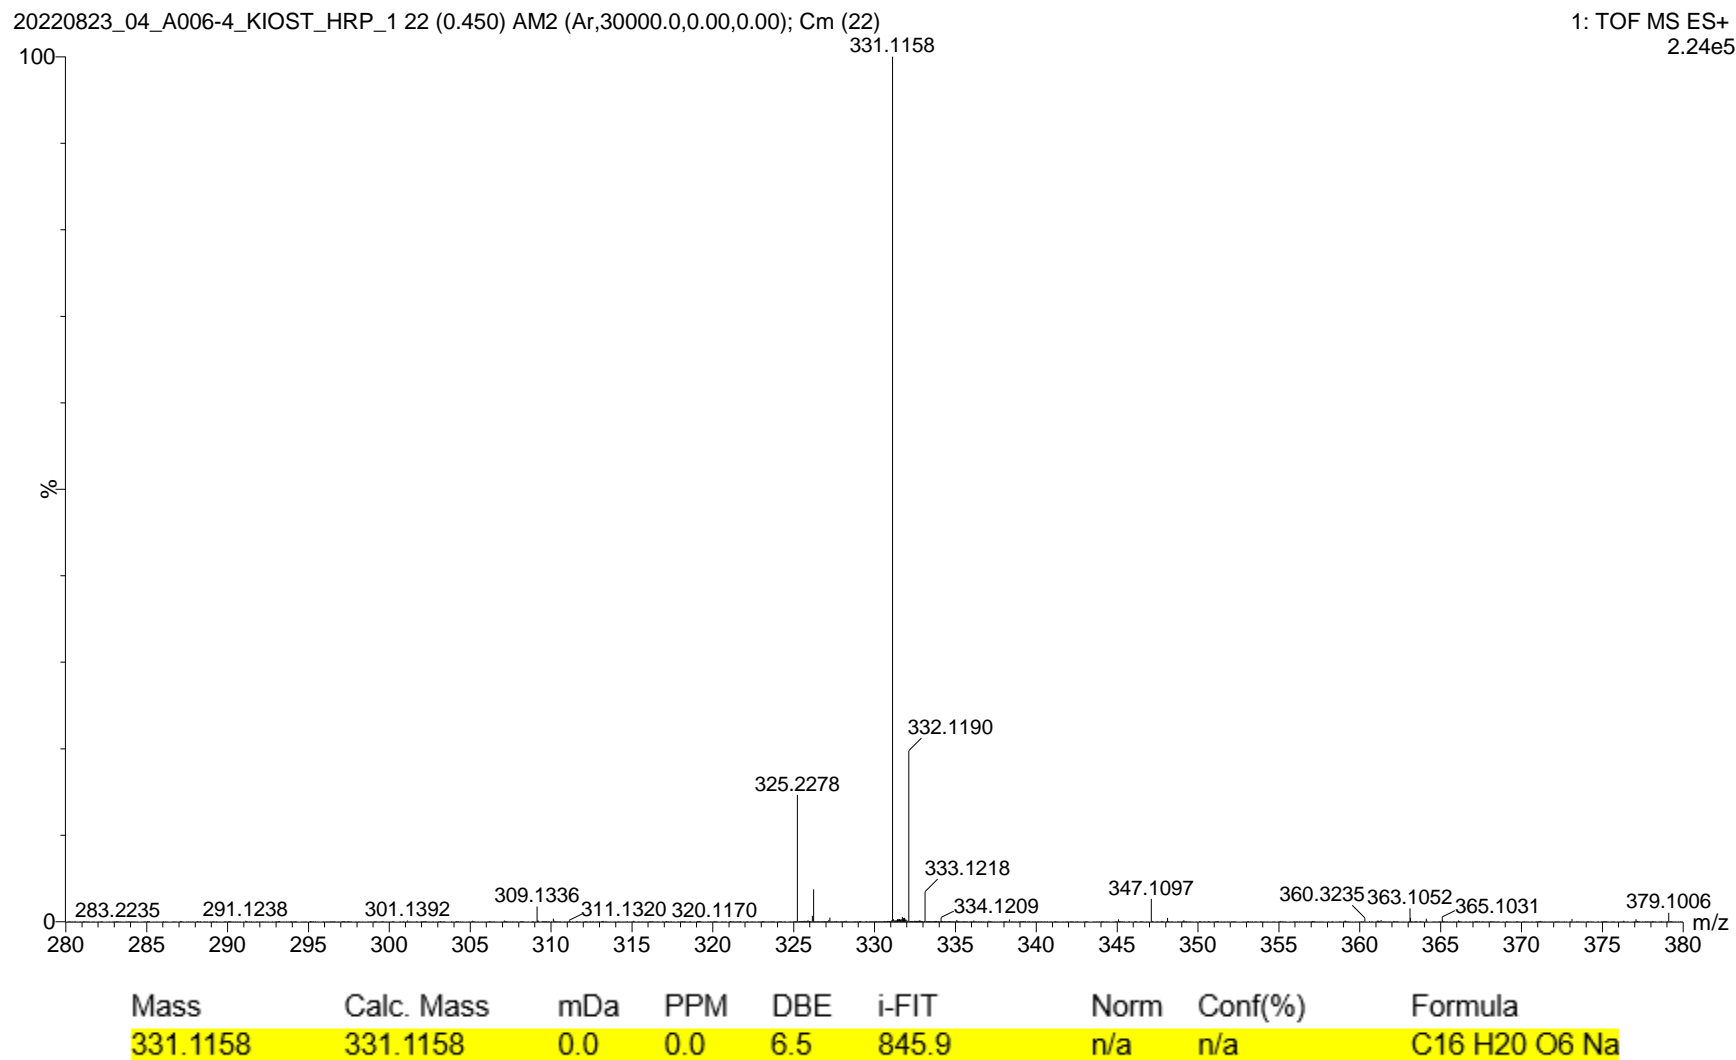

**Figure S16.** HRESIMS data of **4**.

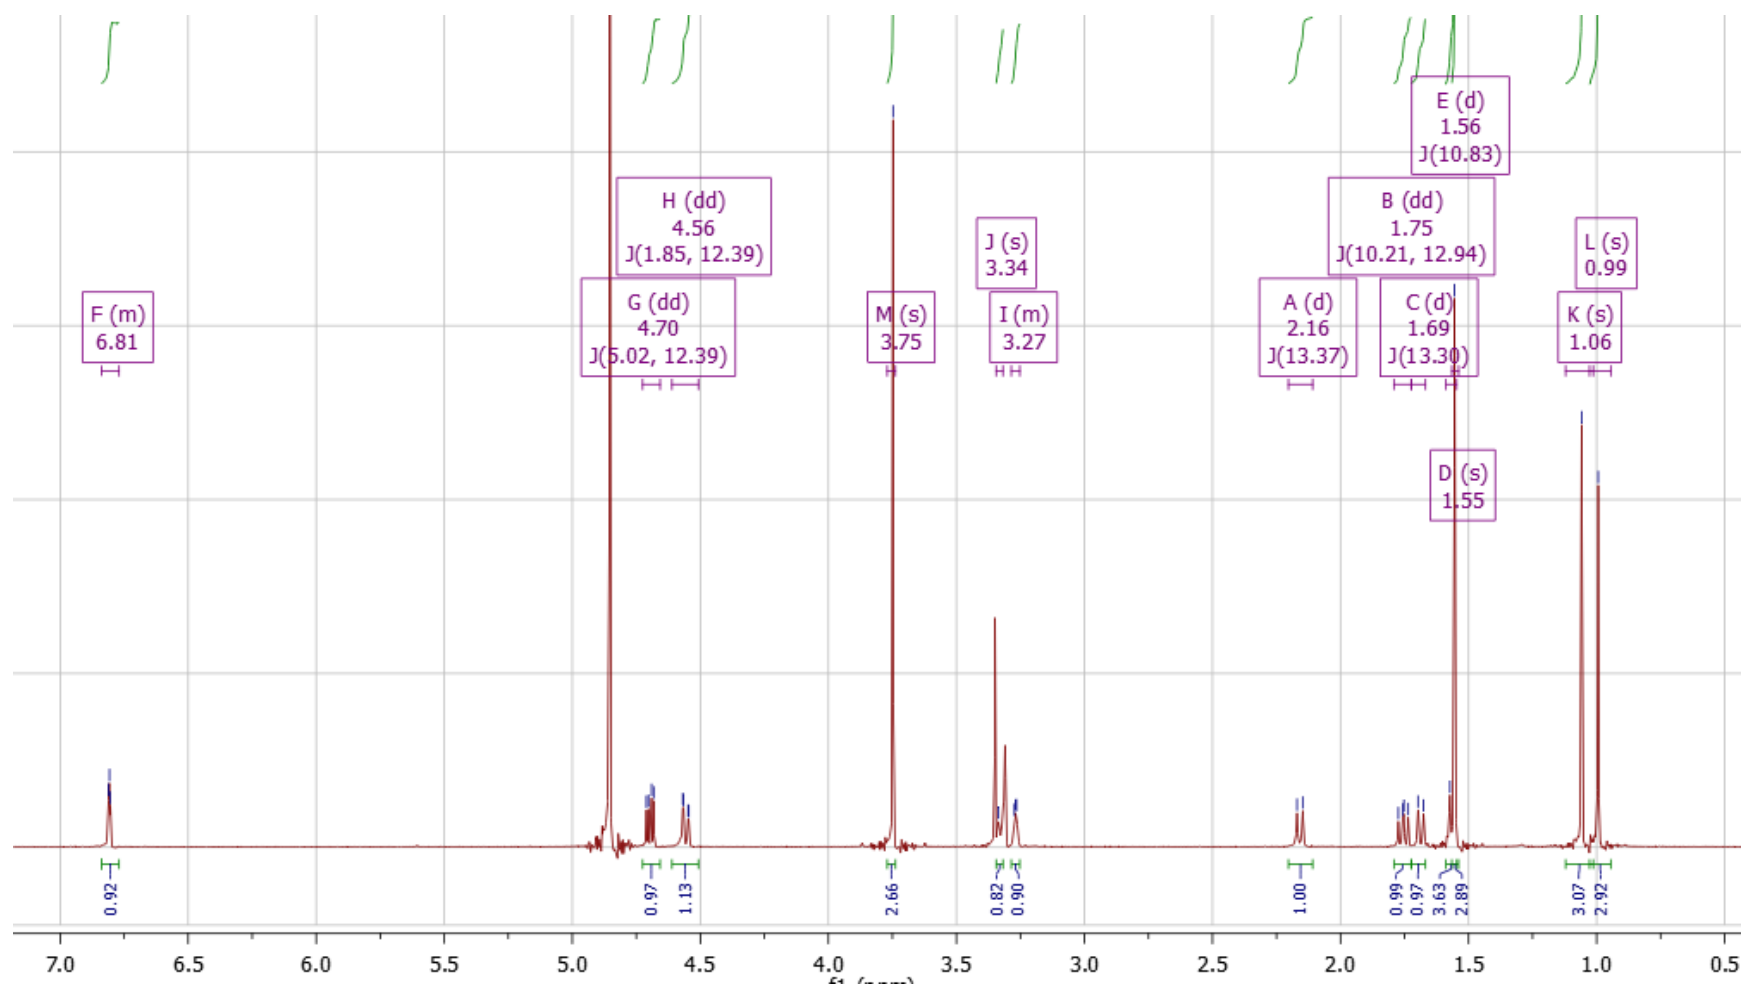

**Figure S17.**  $^1\text{H}$  NMR spectrum of **7**.

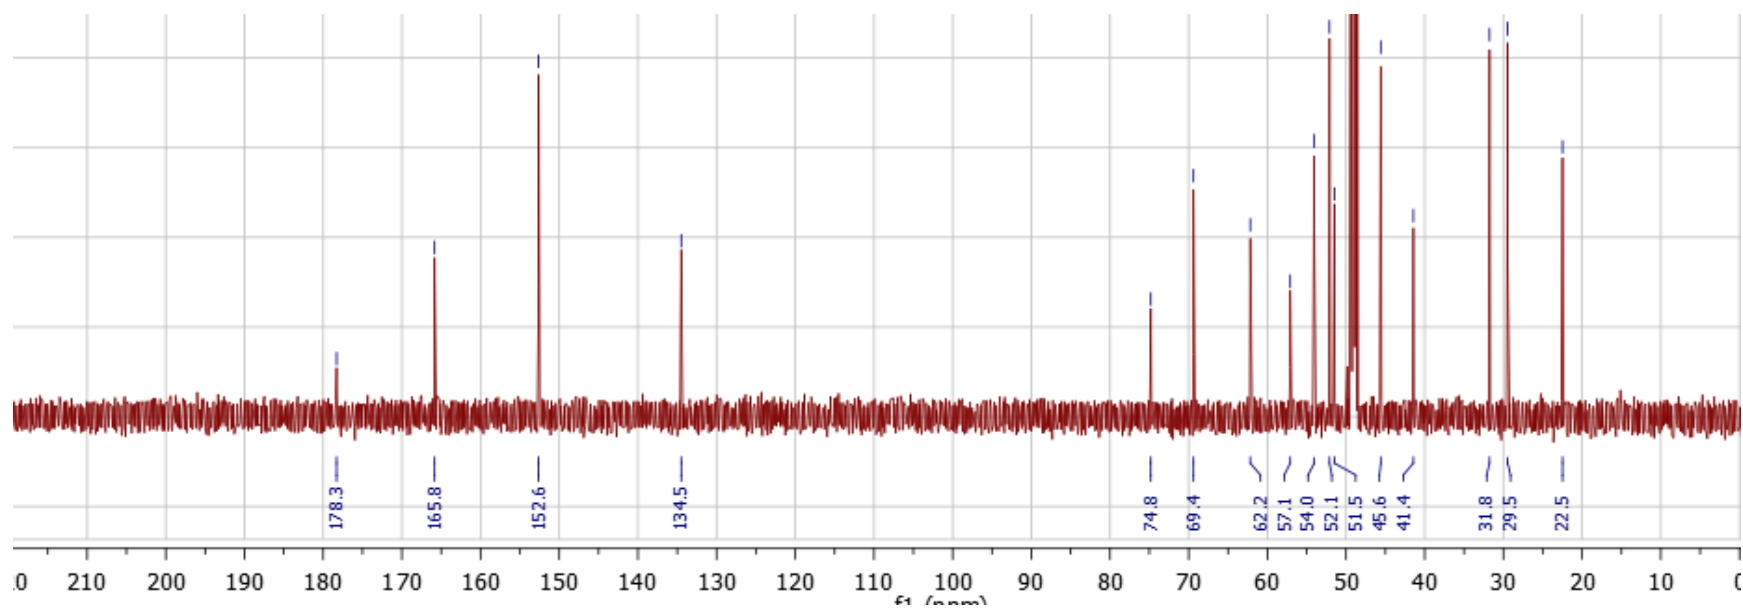

**Figure S18.**  $^{13}\text{C}$  NMR spectrum of **7**.

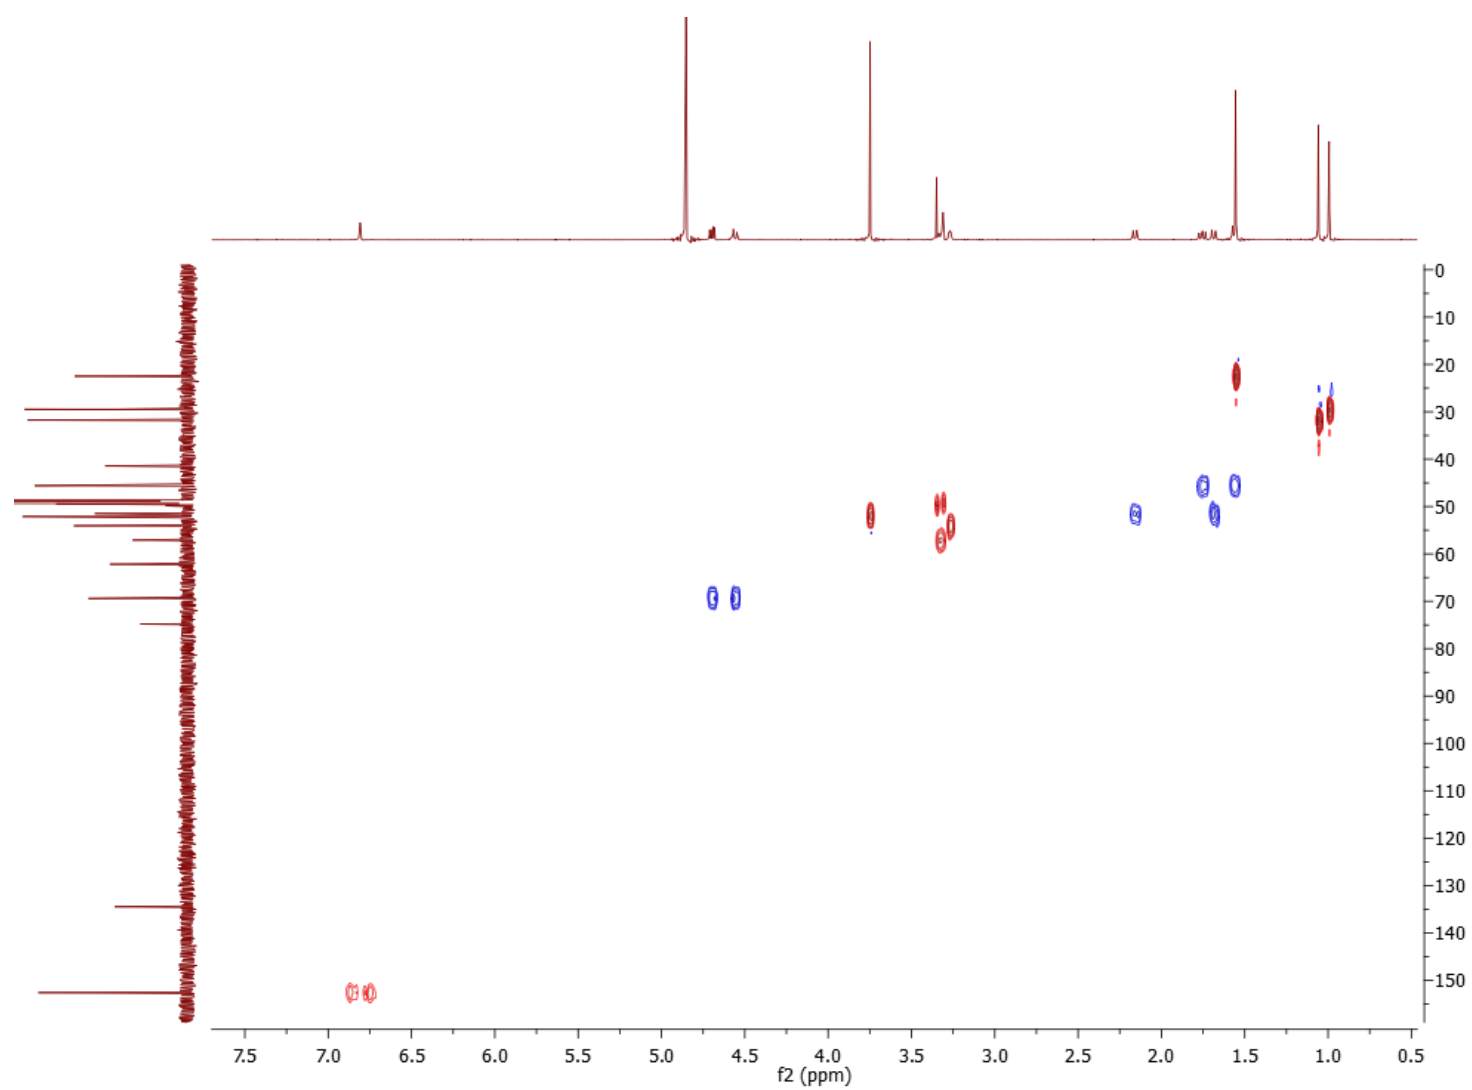

**Figure S19.** HSQC spectrum of **7**.

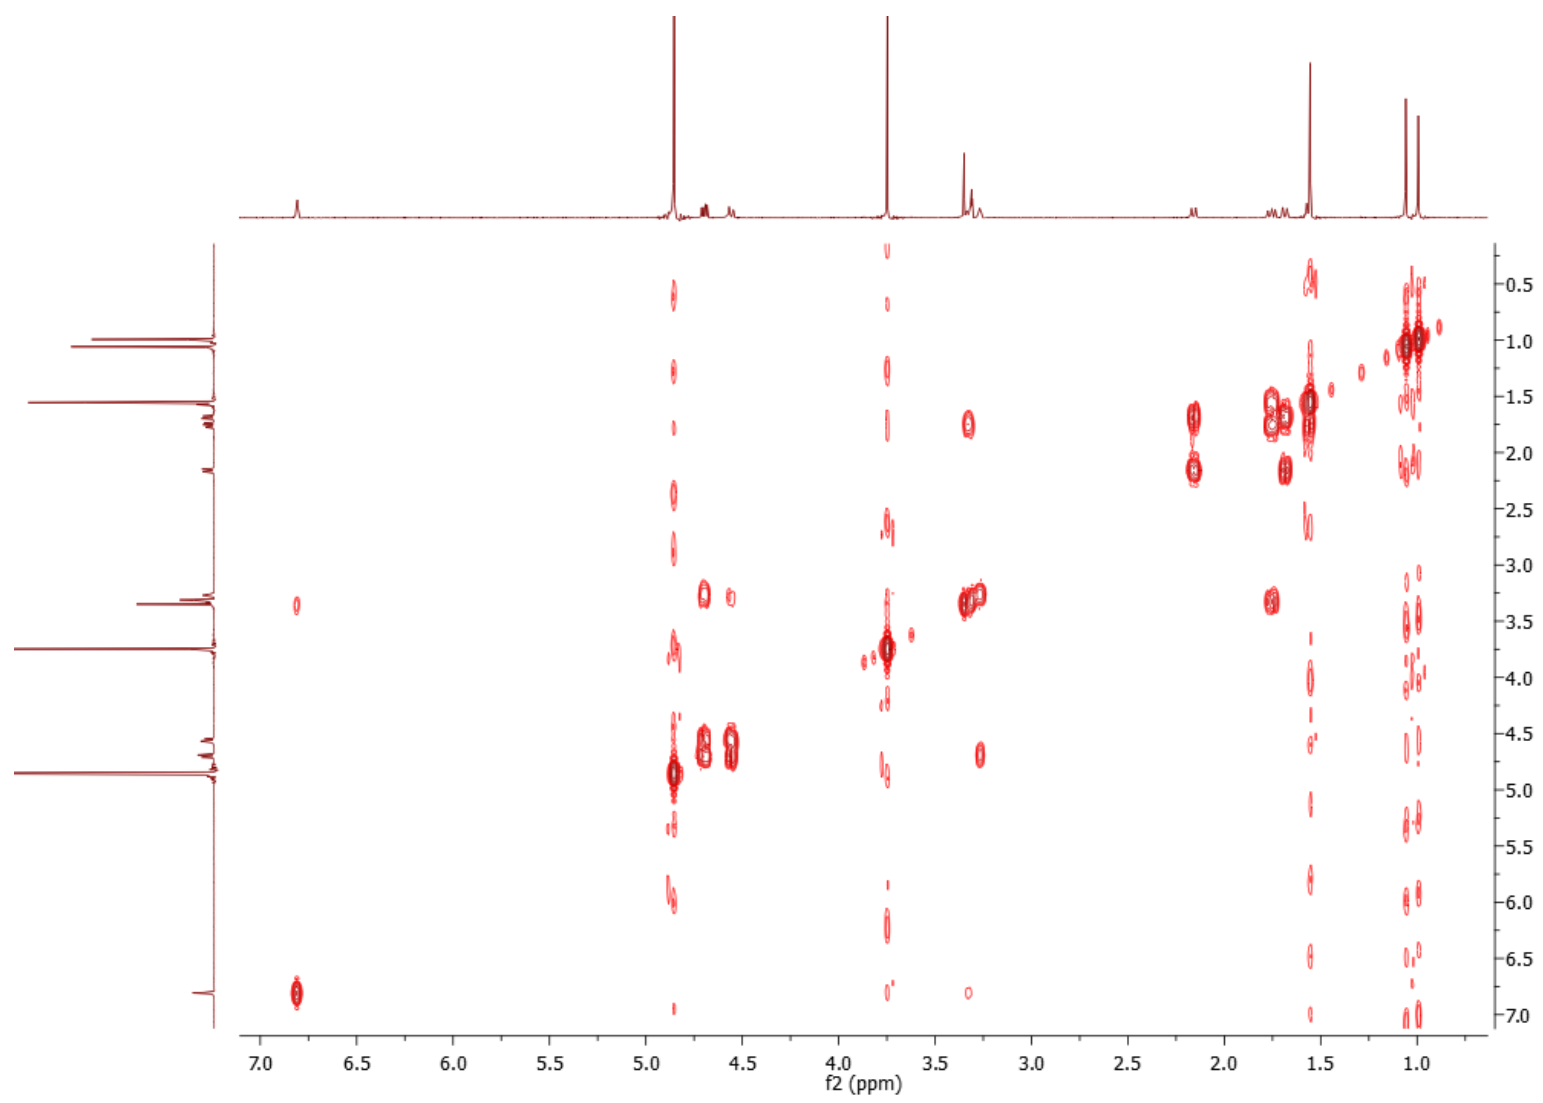

**Figure S 20.**  $^1\text{H}$ - $^1\text{H}$  COSY spectrum of **7**.

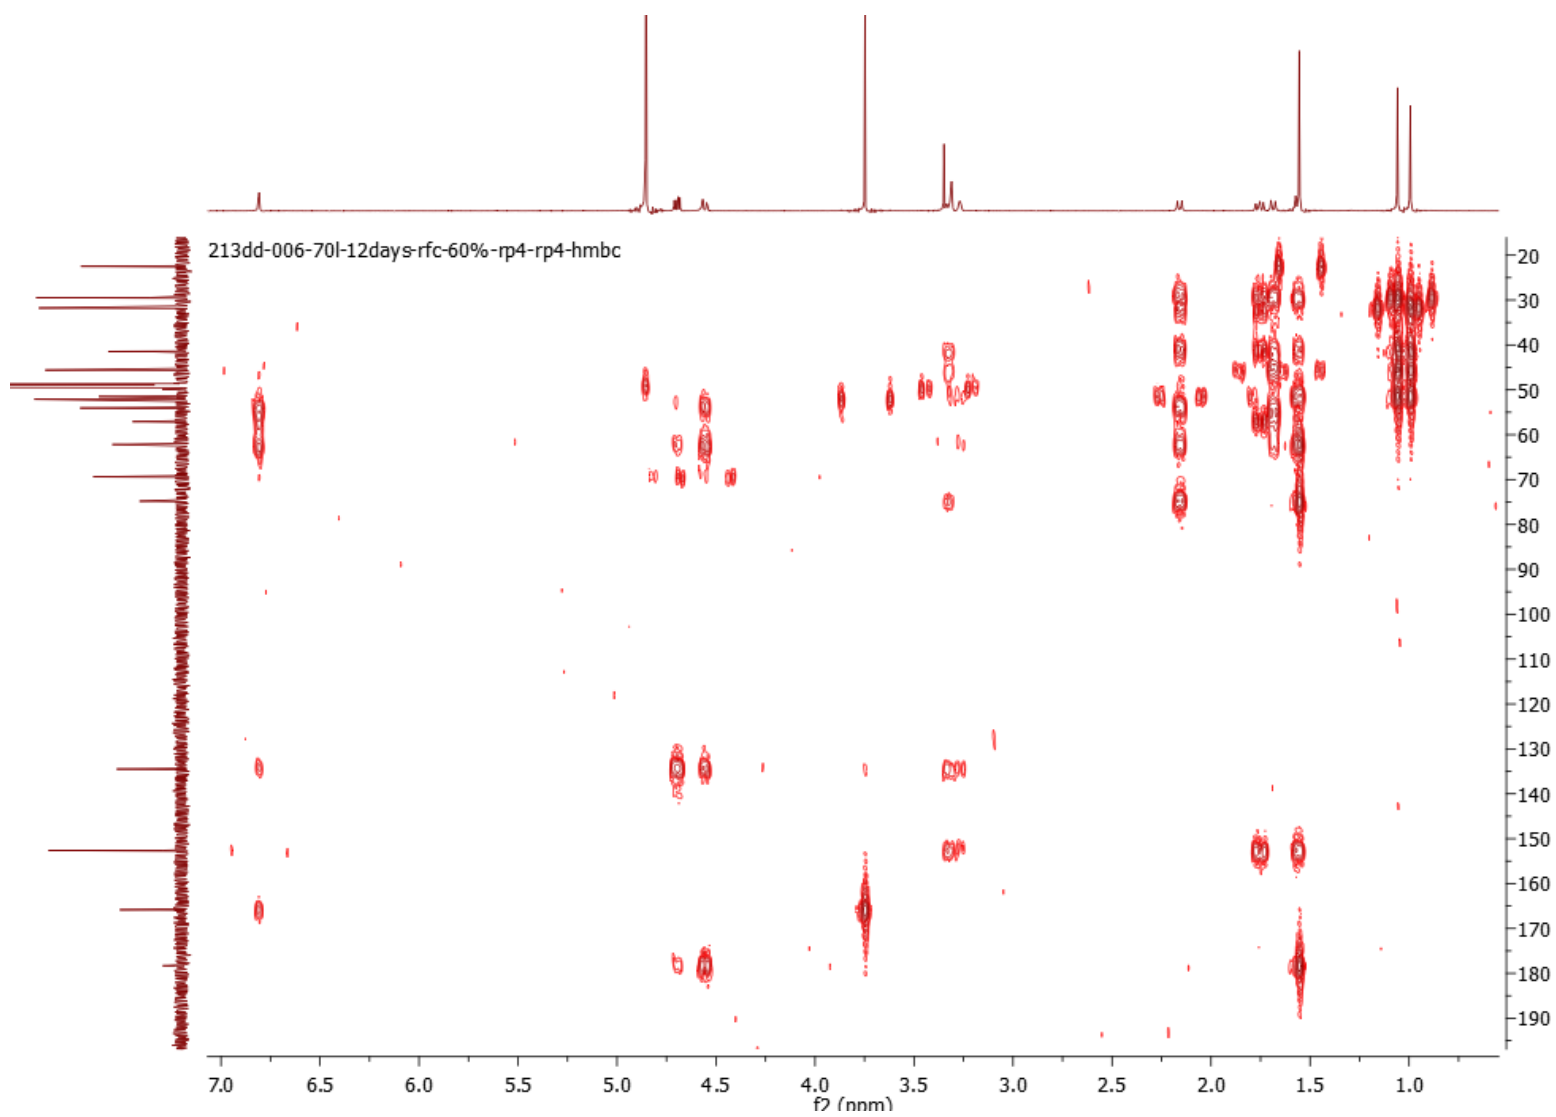

**Figure S21.** HMBC spectrum of **7**.

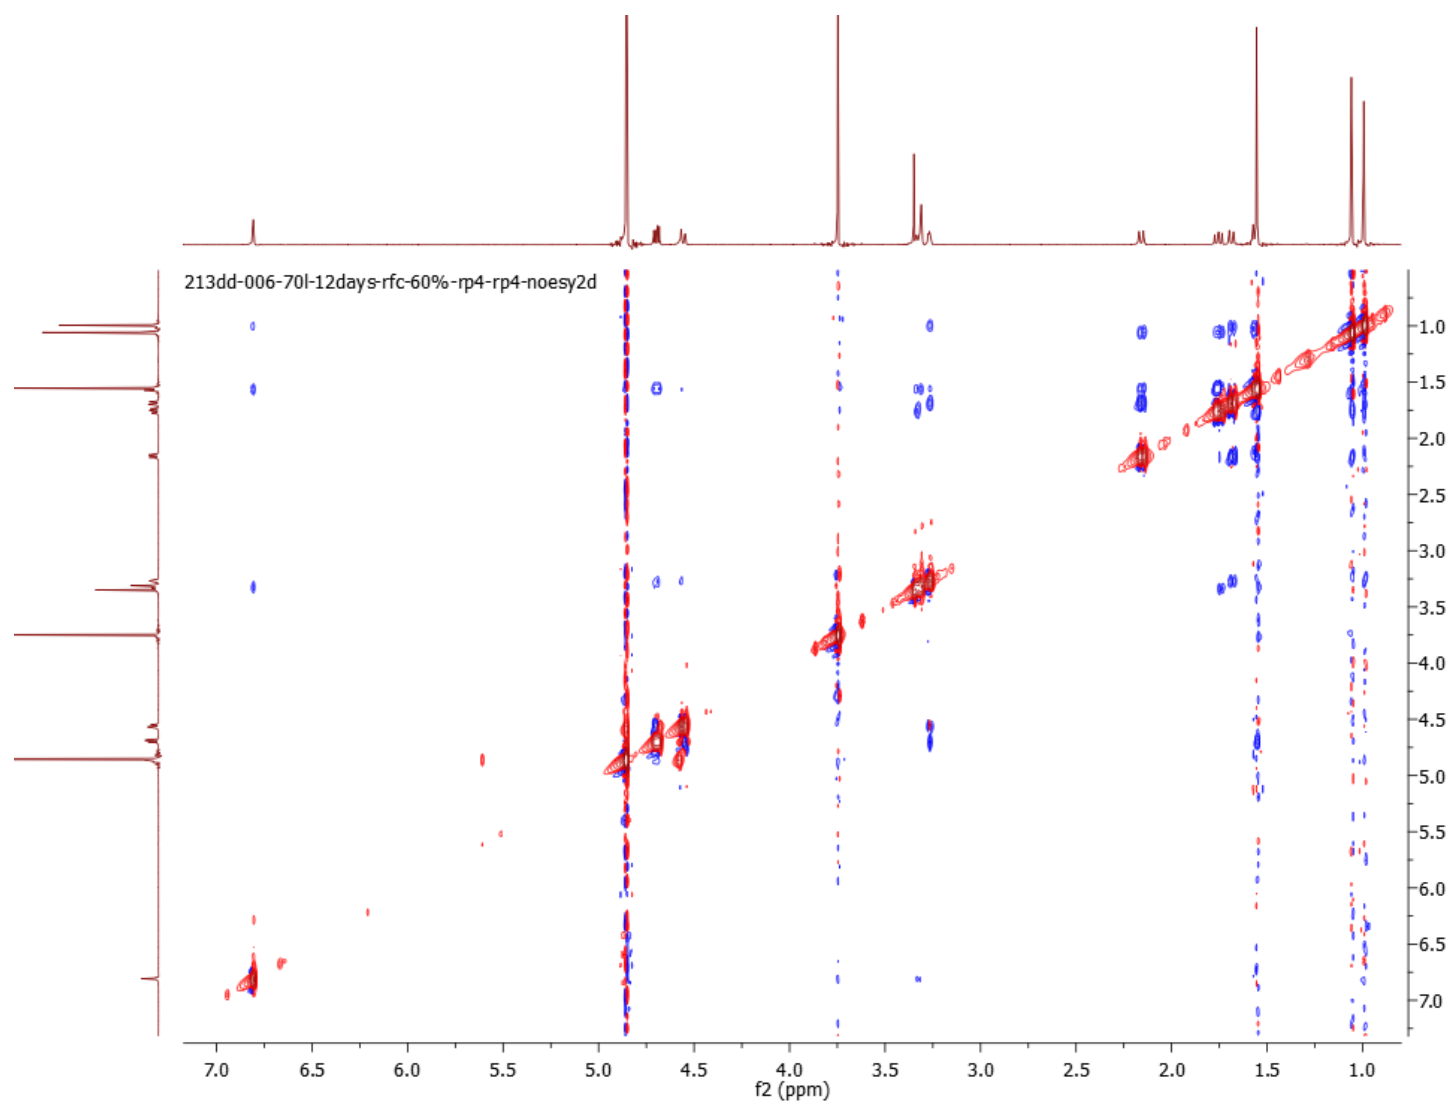

**Figure S22.** NOESY spectrum of **7**.



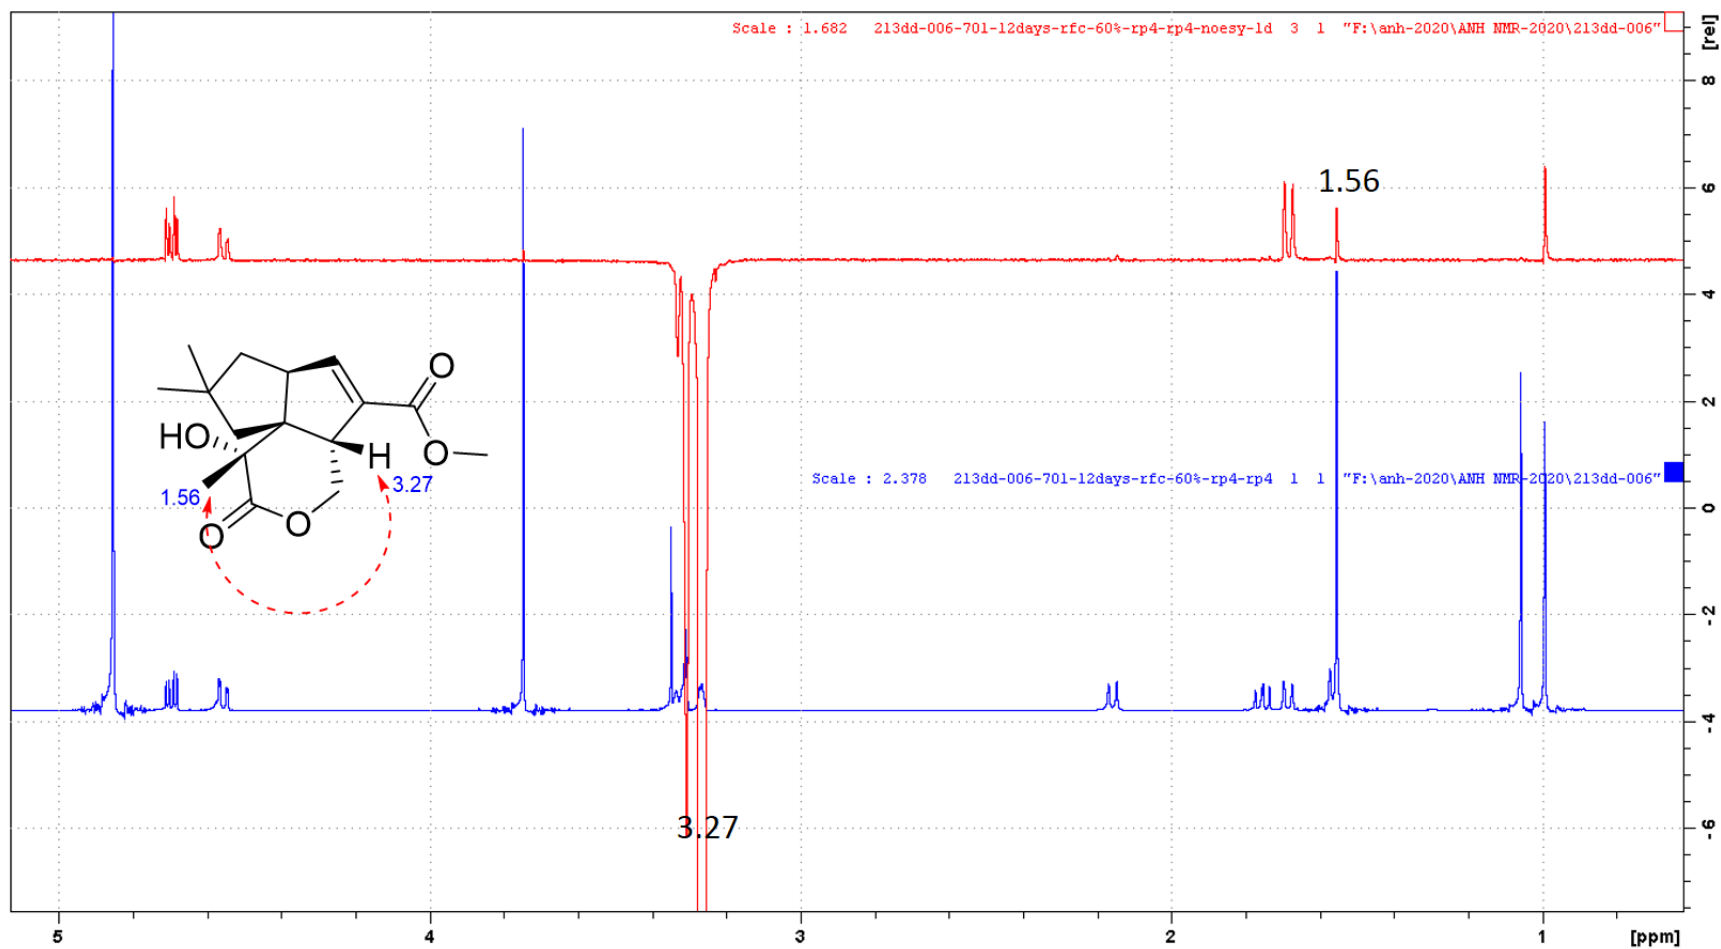

**Figure S23.** 1D selective NOESY spectrum of **7** (irradiated at H-5).

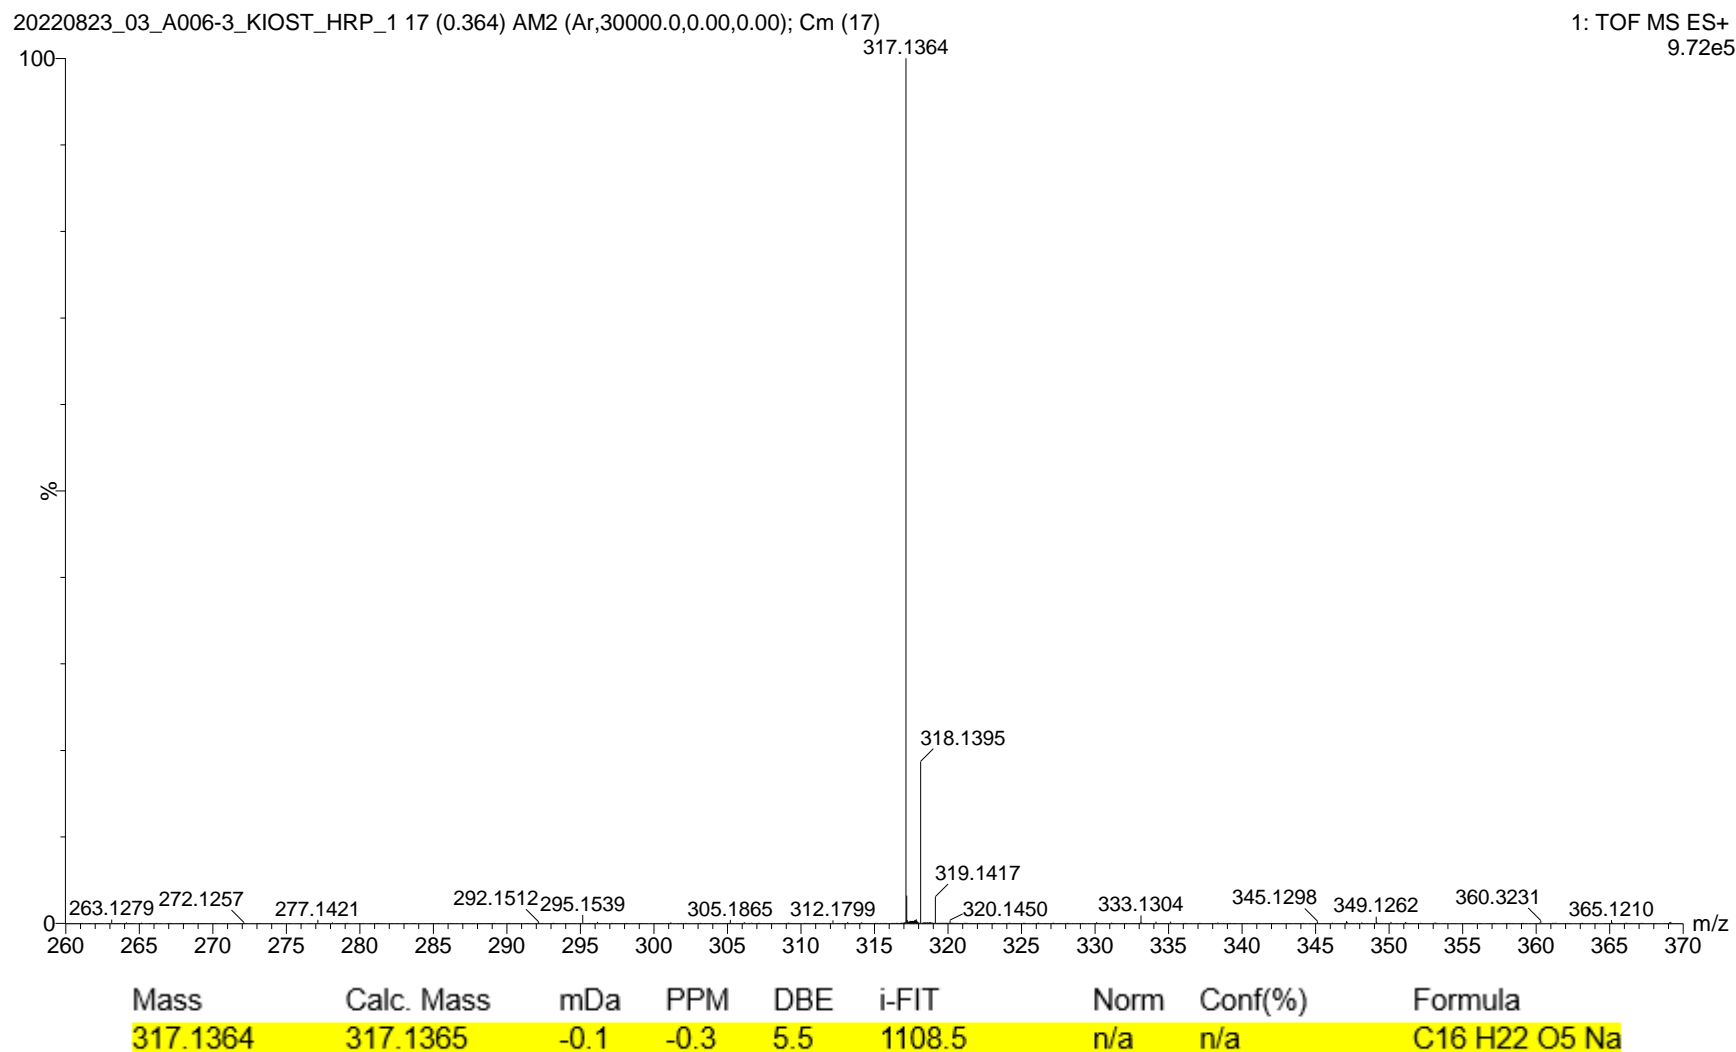

**Figure S24.** HRESIMS data of **7**.

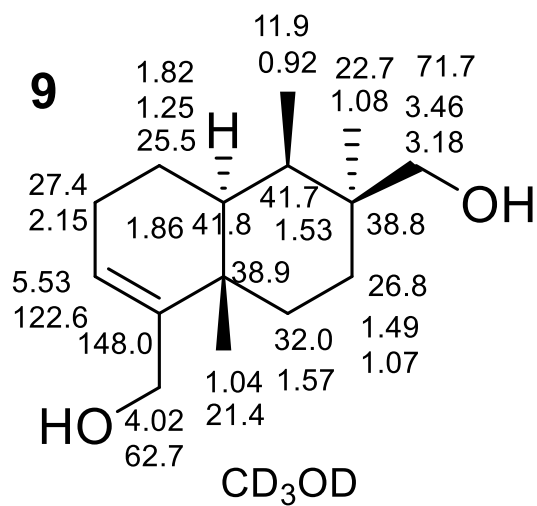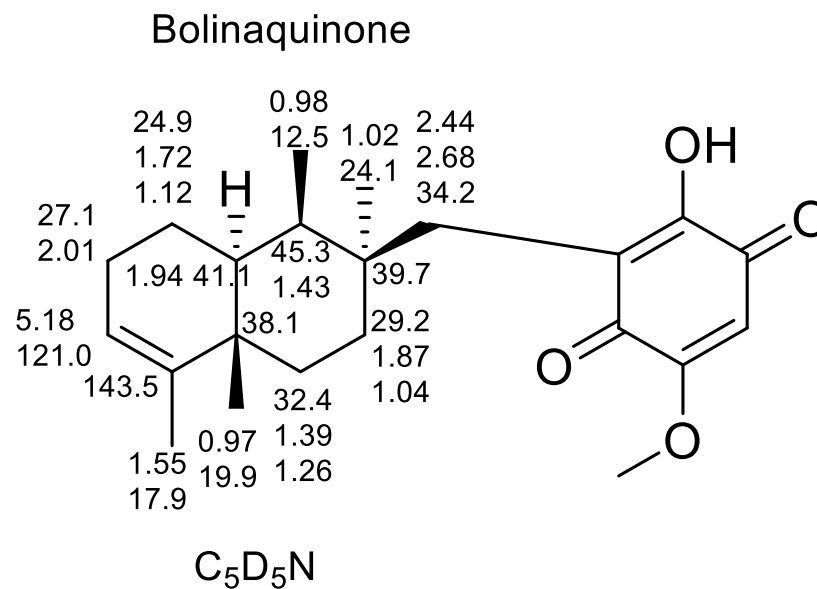

*J. Org. Chem.* **1998**, 63, 8042-8044,  
10.1021/jo981037t

**Figure S25.** Comparison NMR data of bolinane A (**9**) with bolinaquinone.

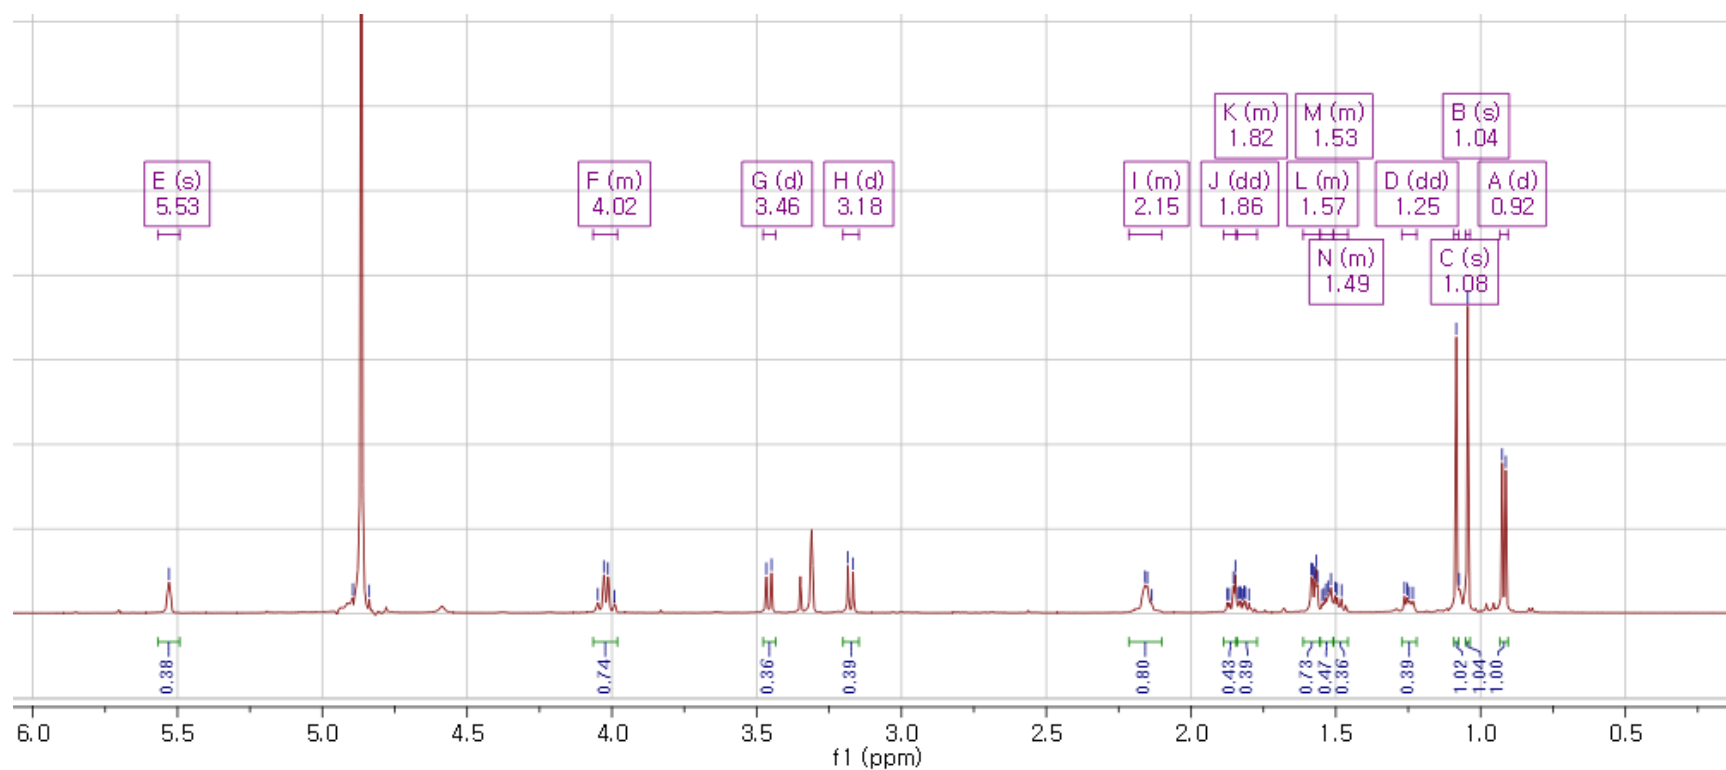

**Figure S26.** <sup>1</sup>H NMR spectrum of **9**.

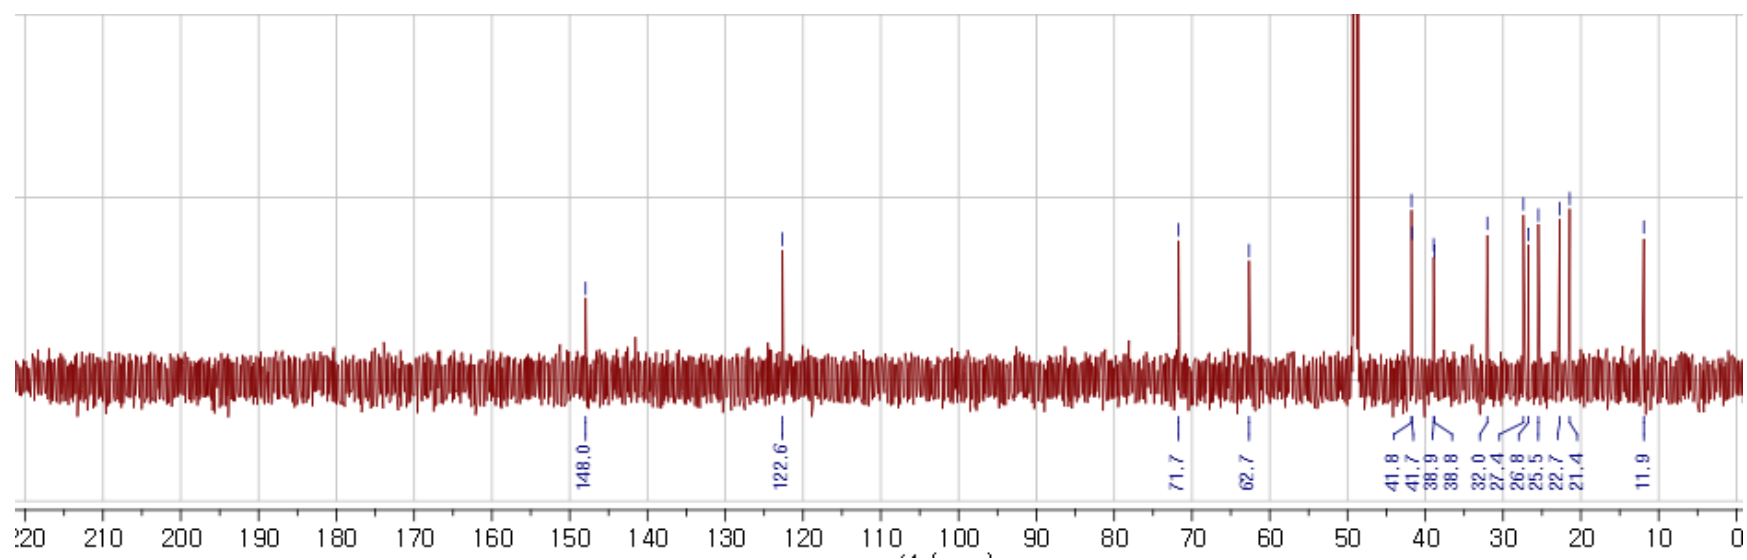

**Figure S27.**  $^{13}\text{C}$  NMR spectrum of **9**.

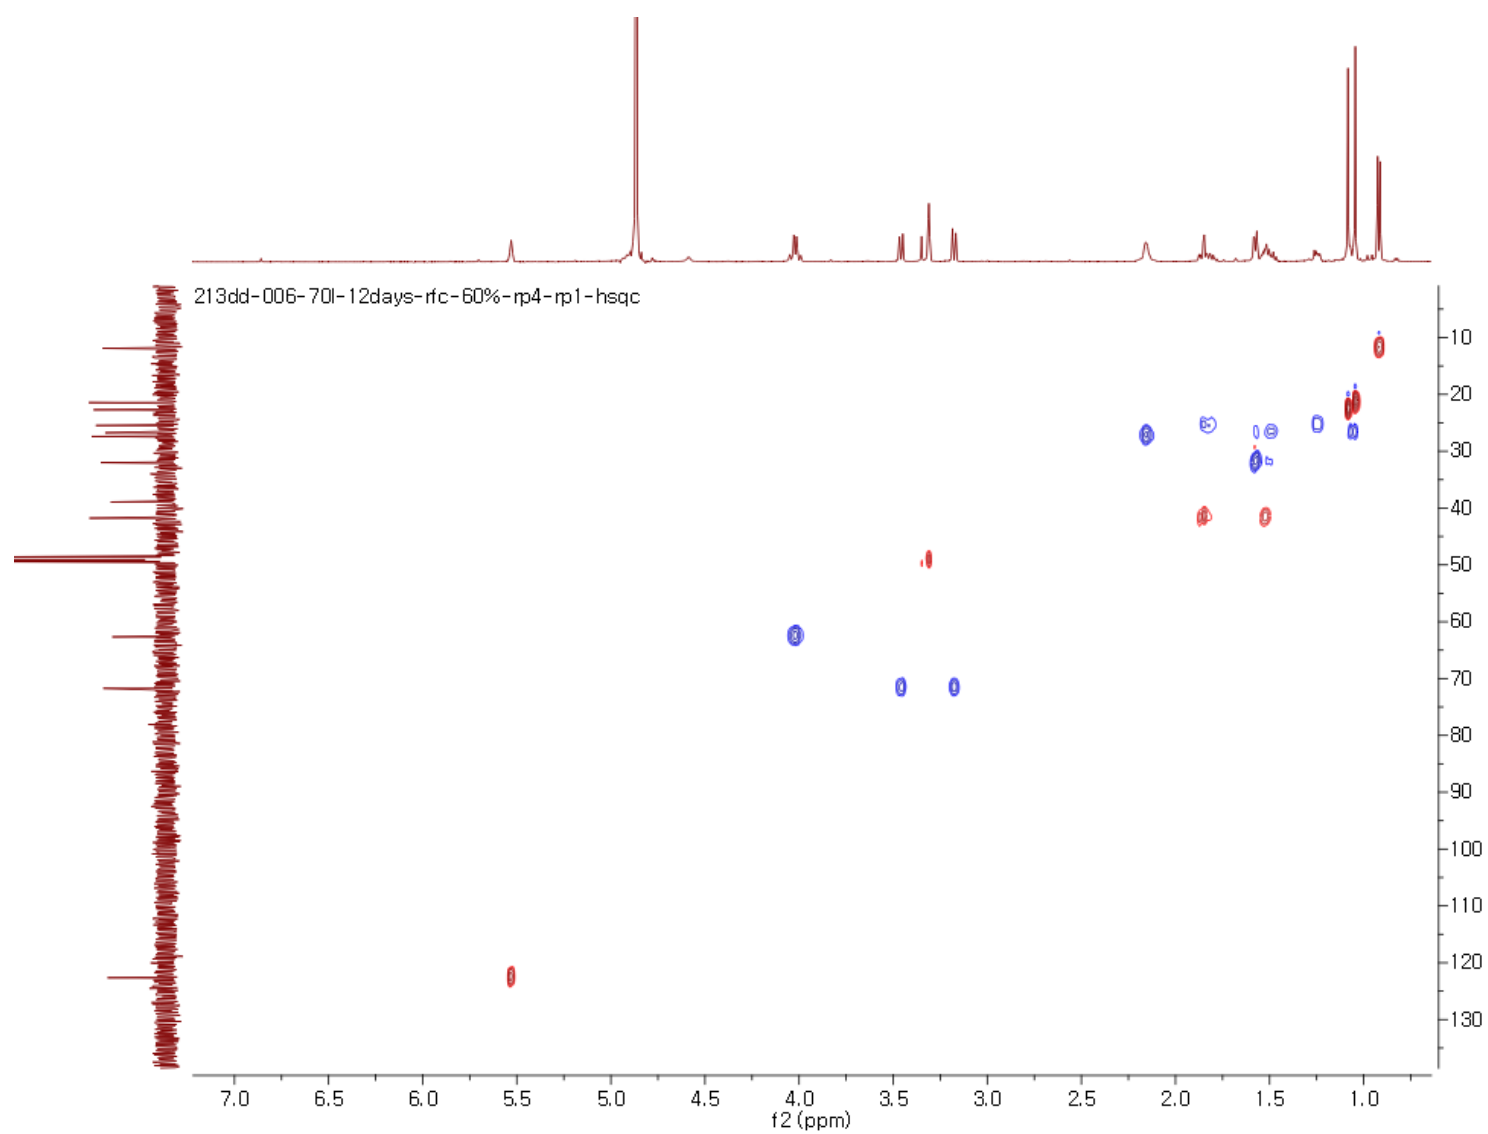

**Figure S28.** HSQC spectrum of **9**.

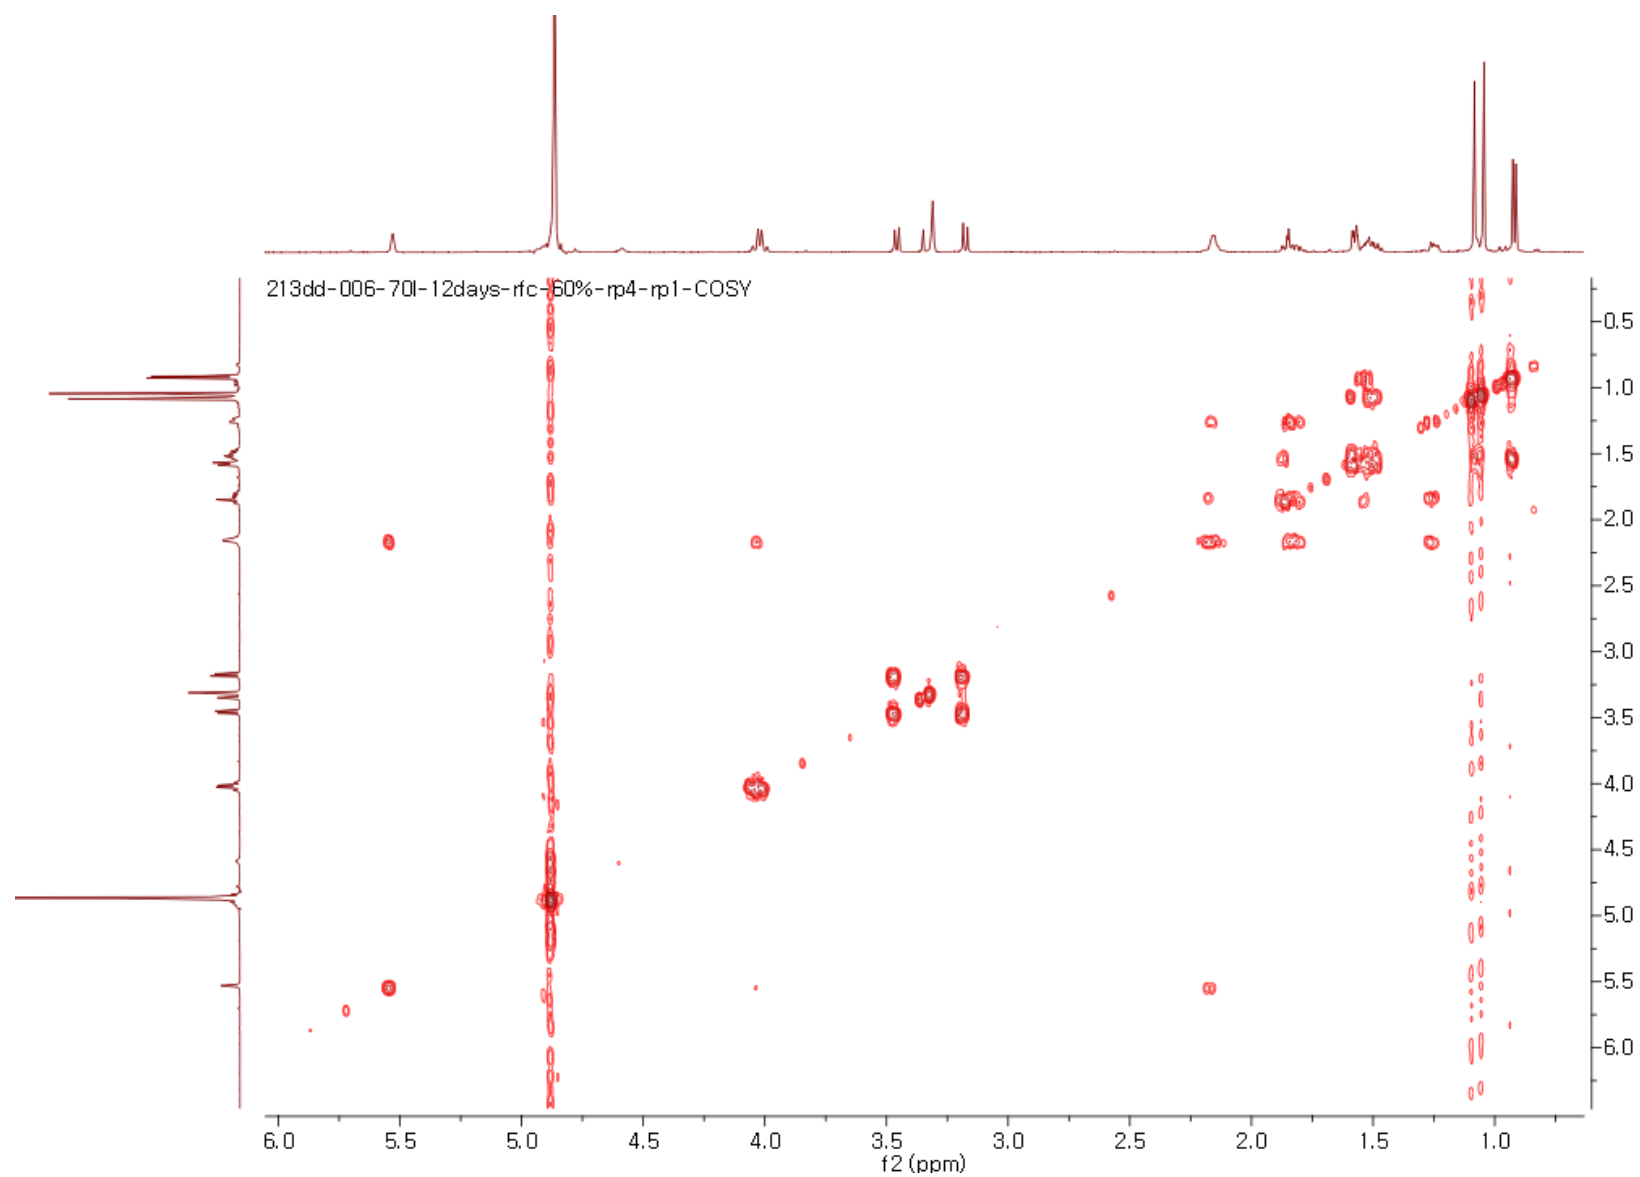

**Figure S29.**  $^1\text{H}$ - $^1\text{H}$  COSY spectrum of **9**.

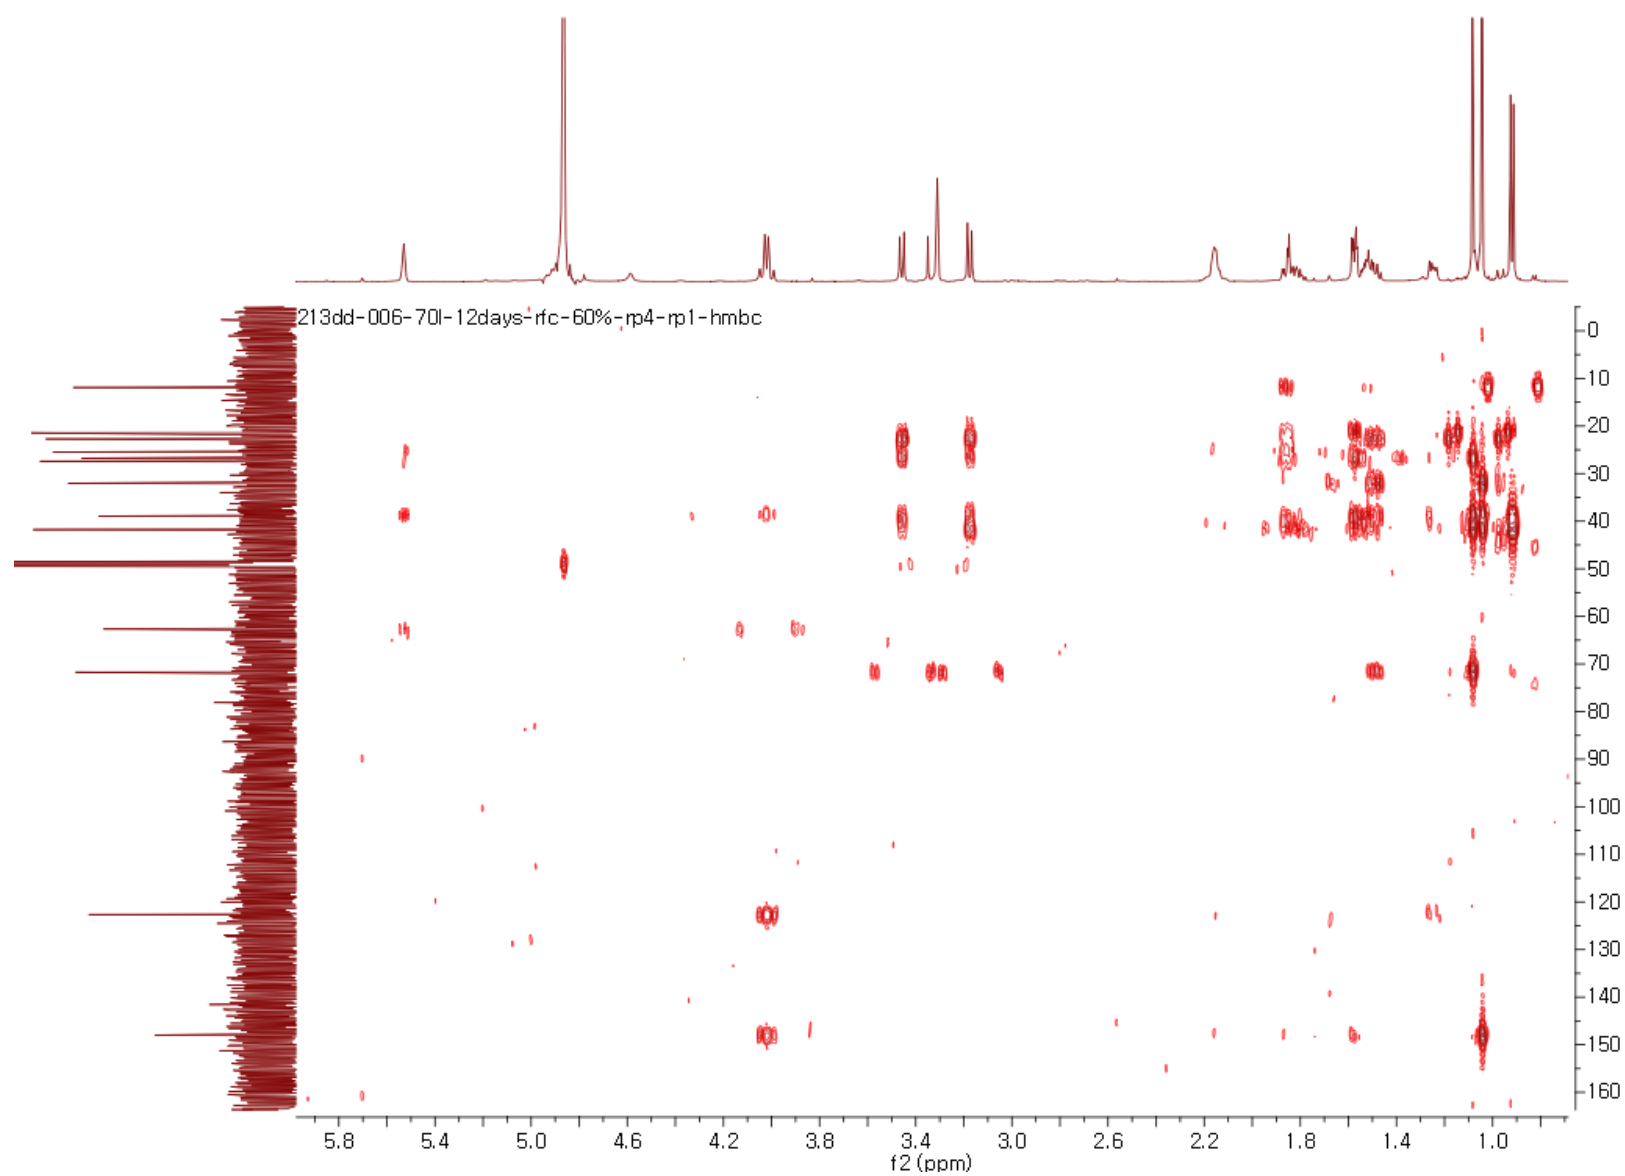

**Figure S30.** HMBC spectrum of **9**.



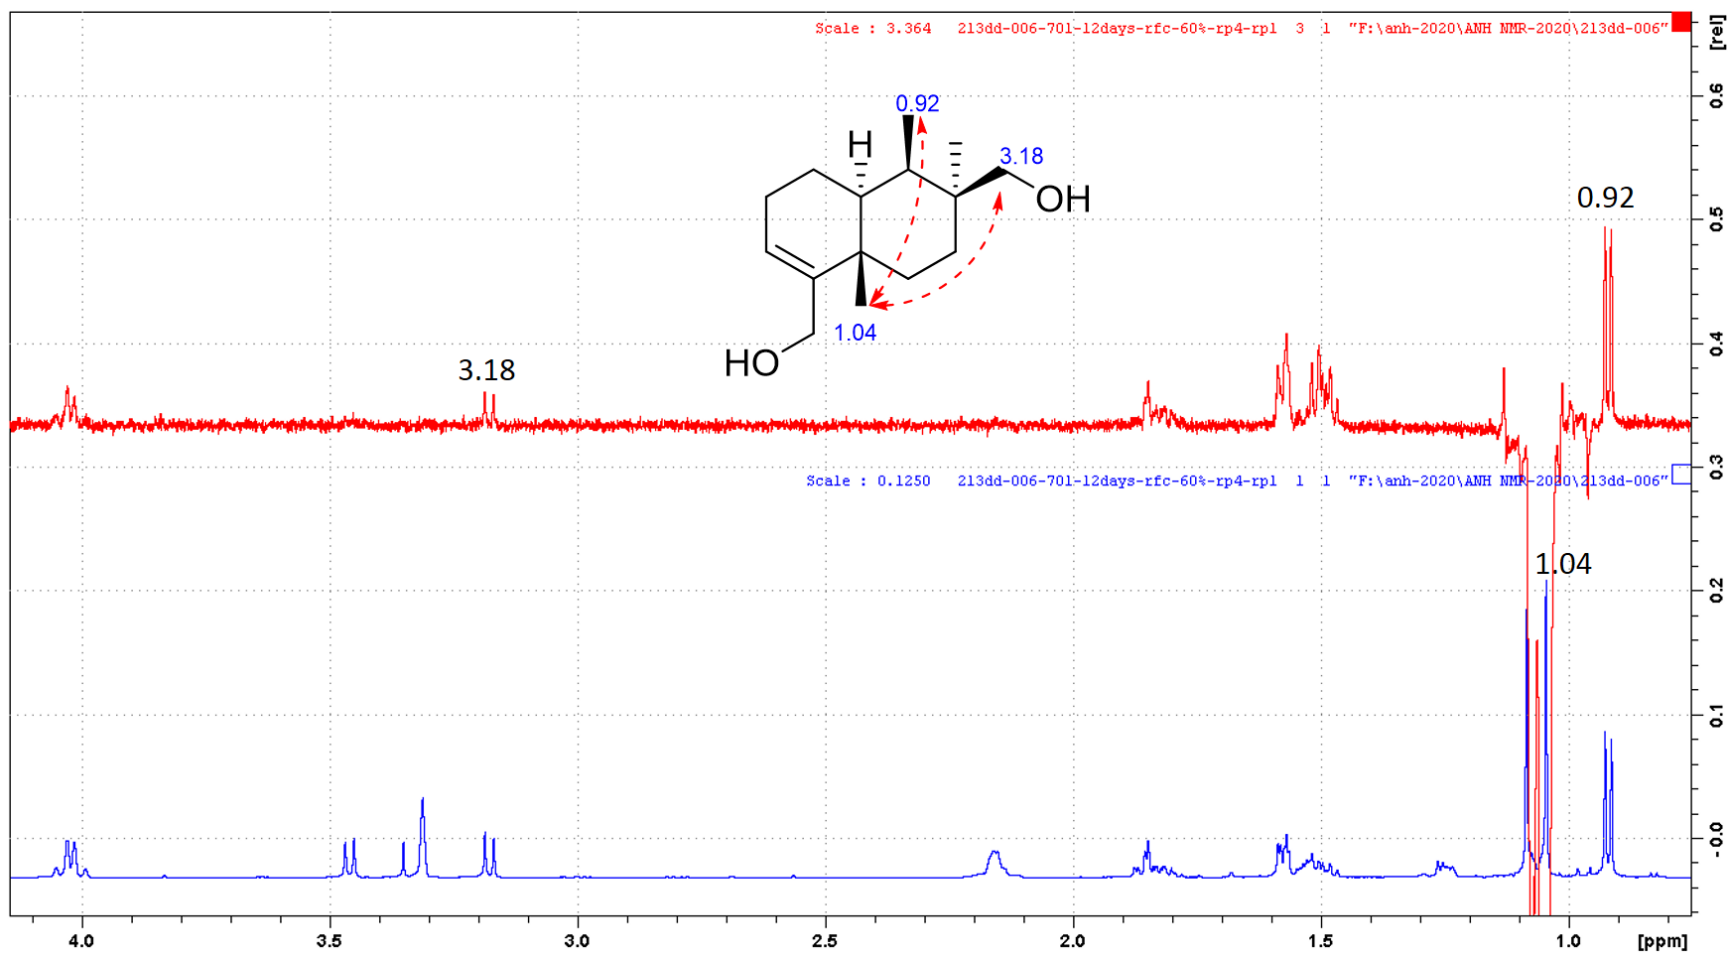

**Figure S31.** Selective 1D NOESY spectrum of **9** (irradiated at H<sub>3</sub>-12).

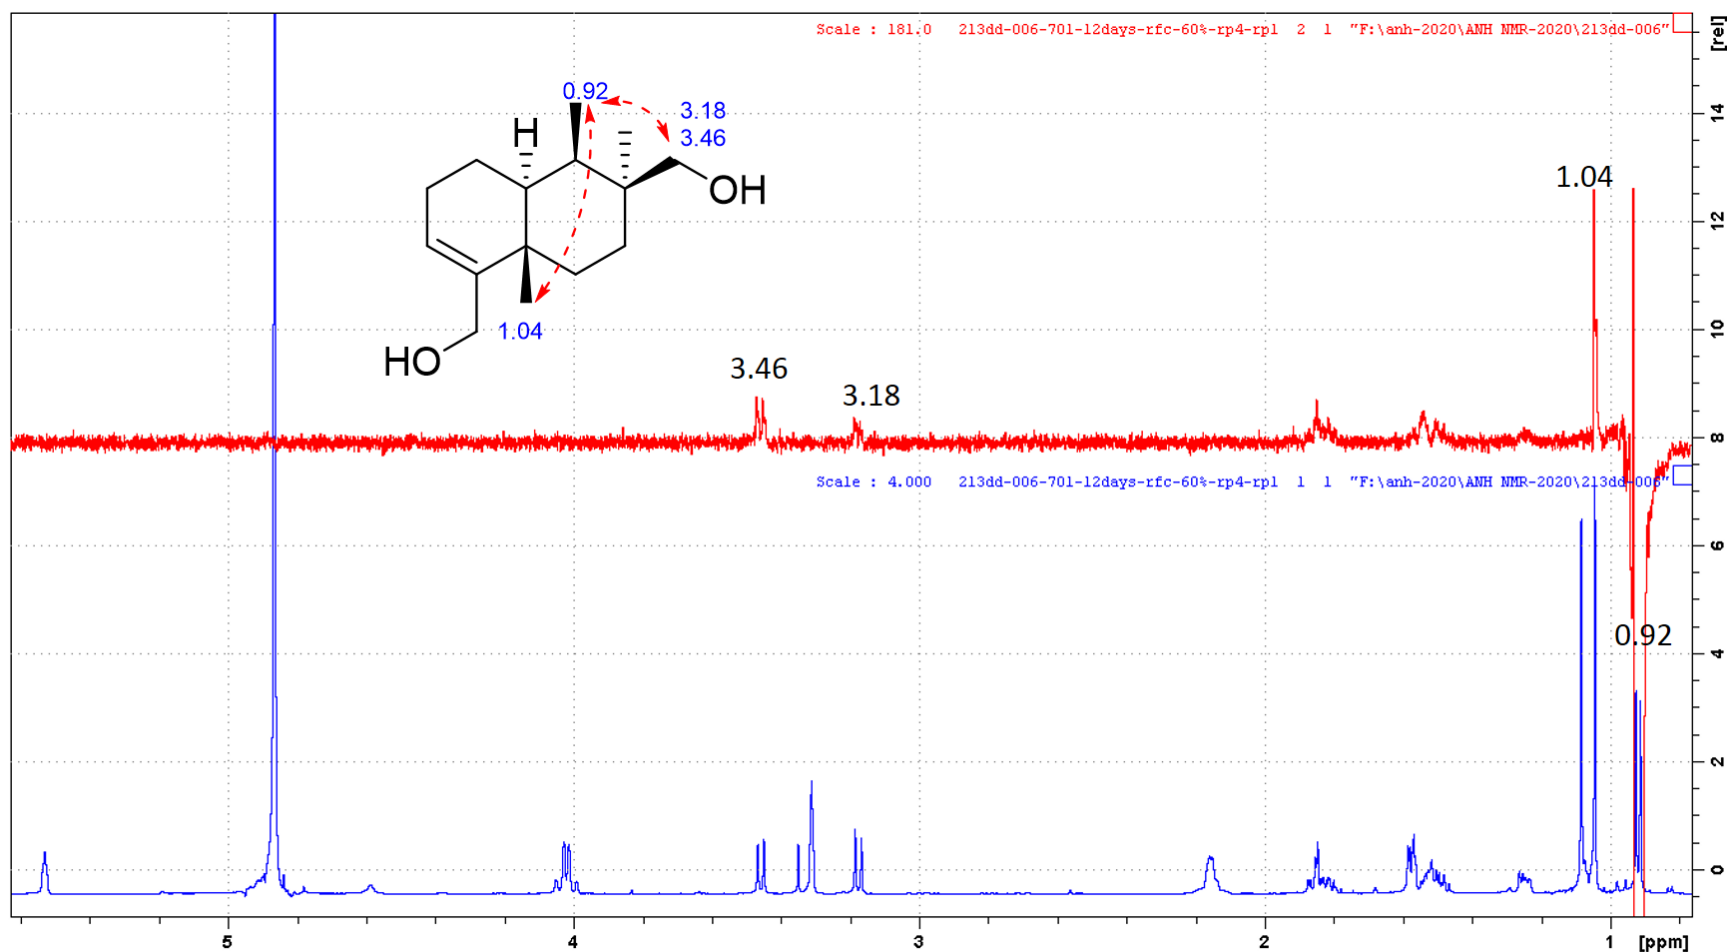

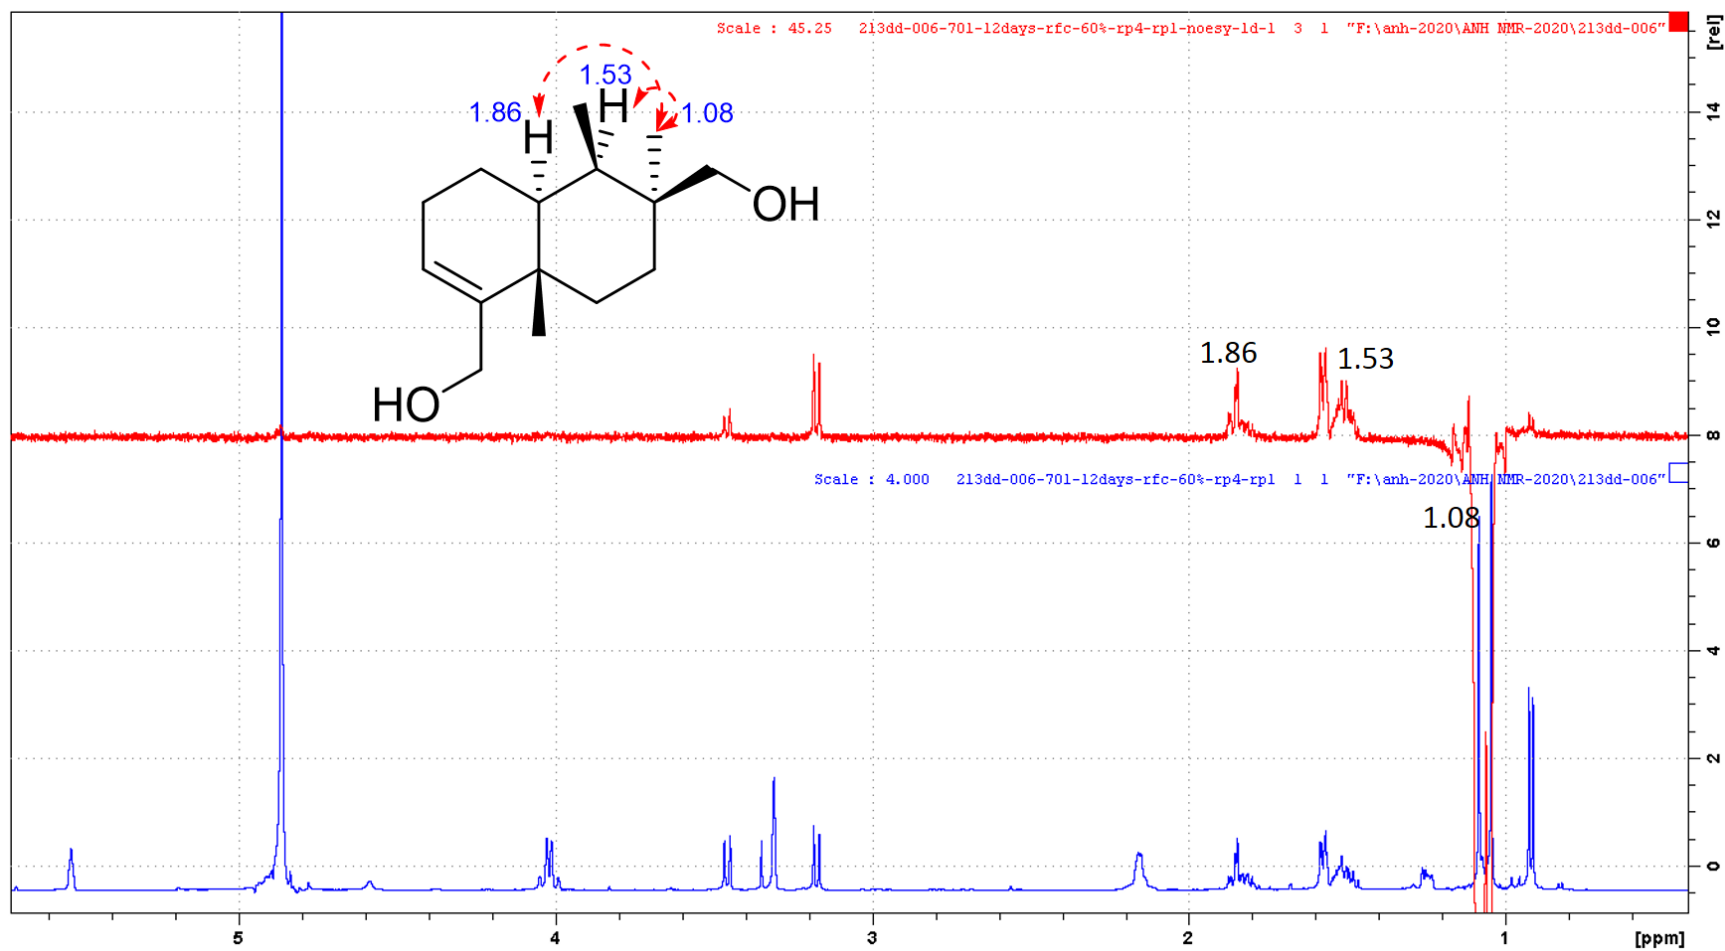

**Figure S33.** Selective 1D NOESY spectrum of **9** (irradiated at H<sub>3</sub>-13).

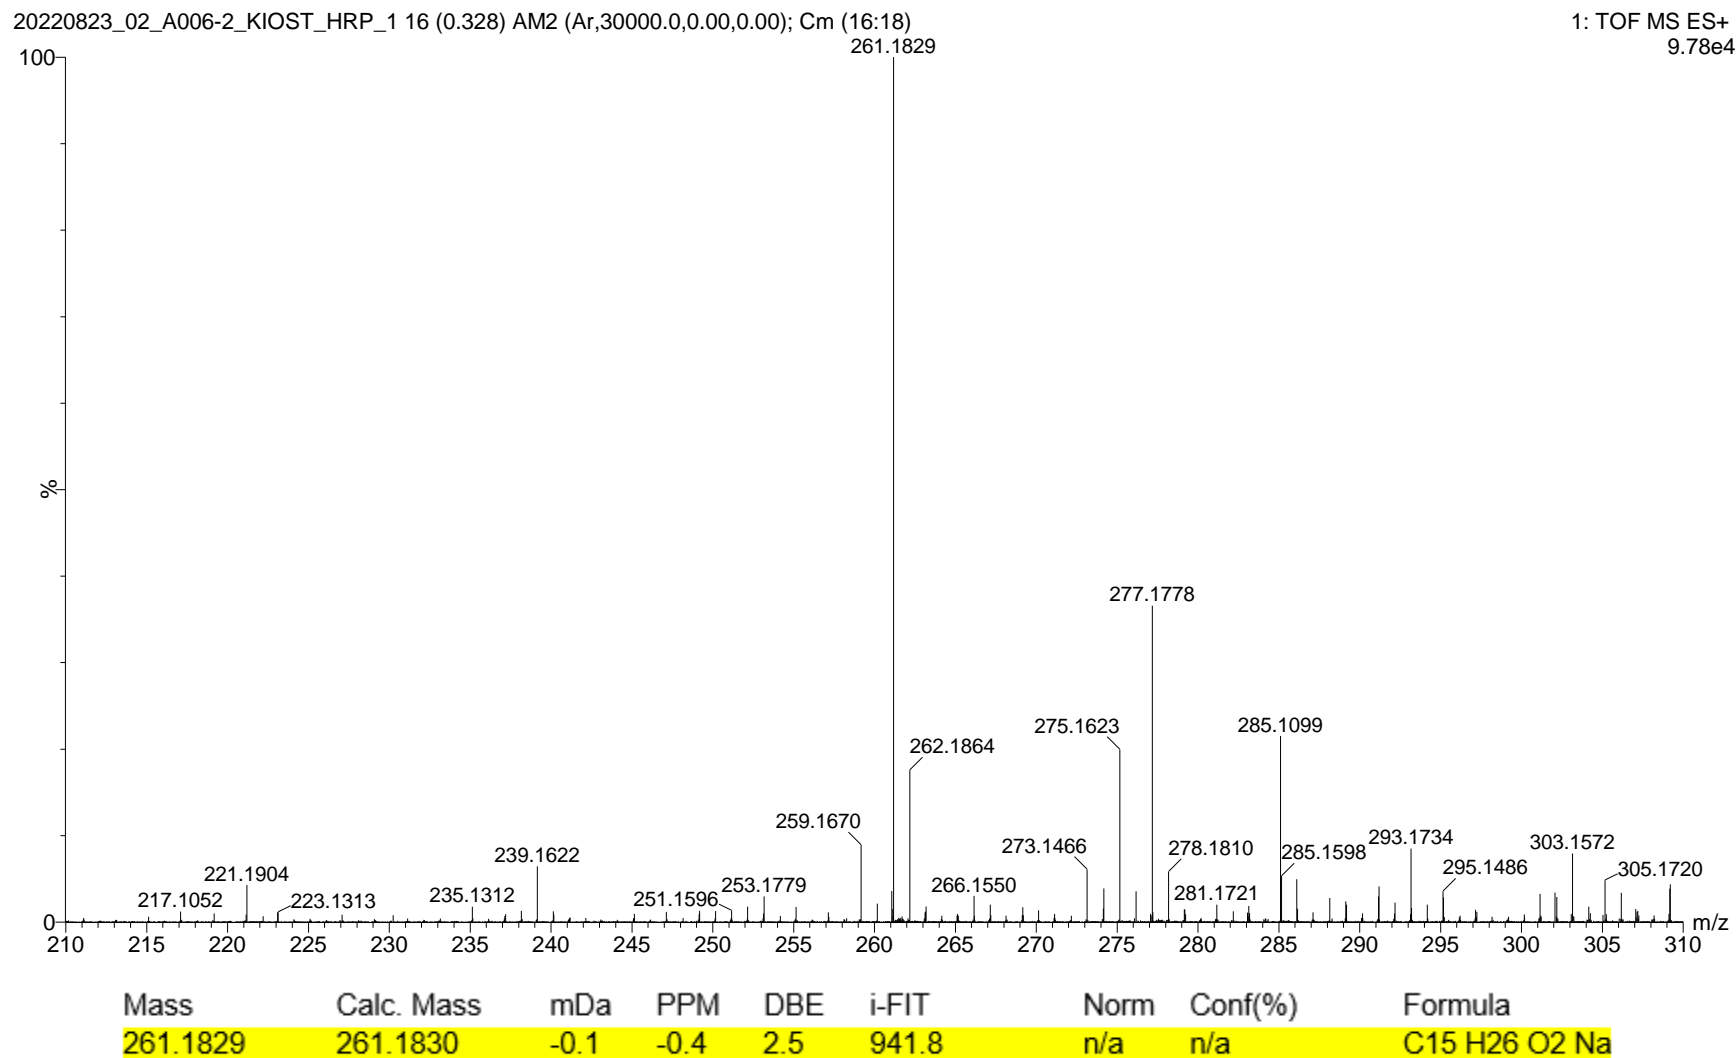

**Figure S34.** HRESIMS data of **9**.

| ACHN       |        |       |       |      |        |       |        |       |            |        |      |
|------------|--------|-------|-------|------|--------|-------|--------|-------|------------|--------|------|
| Conc.(uM)  | 1      |       | 2     |      | 3      |       | 4      |       | 5          |        |      |
|            | Mean   | SD    | Mean  | SD   | Mean   | SD    | Mean   | SD    | Mean       | SD     |      |
| 30         | 80.52  | 6.02  | 86.30 | 4.34 | 75.45  | 5.45  | -15.53 | 3.40  | -9.47      | 7.91   |      |
| 10         | 88.42  | 5.74  | 90.30 | 7.11 | 84.29  | 3.31  | 27.38  | 6.75  | 21.55      | 5.26   |      |
| 3          | 90.11  | 5.84  | 94.05 | 3.29 | 92.49  | 6.33  | 32.37  | 7.47  | 28.72      | 9.93   |      |
| 1          | 89.92  | 2.70  | 97.44 | 1.06 | 95.10  | 5.56  | 87.50  | 4.89  | 84.26      | 5.07   |      |
| 0.3        | 94.85  | 5.54  | 98.75 | 1.74 | 97.70  | 2.30  | 95.35  | 2.98  | 96.94      | 3.86   |      |
| GI50       | >30    |       | >30   |      | >30    |       | 2.440  | 0.268 | 2.147      | 0.165  |      |
|            |        |       |       |      |        |       |        |       |            |        |      |
| Conc.(uM)  | 6      |       | 7     |      | 8      |       | 9      |       | Adriamycin |        |      |
|            | Mean   | SD    | Mean  | SD   | Mean   | SD    | Mean   | SD    | Mean       | SD     |      |
| 30         | -15.49 | 5.66  | 80.20 | 9.95 | -14.66 | 2.09  | 76.28  | 7.21  | 3          | -11.31 | 3.07 |
| 10         | 17.68  | 8.87  | 82.40 | 2.17 | 18.21  | 3.29  | 81.43  | 5.77  | 1          | -6.82  | 8.81 |
| 3          | 40.66  | 4.80  | 88.08 | 6.96 | 25.64  | 7.09  | 84.05  | 4.43  | 0.3        | 13.78  | 6.87 |
| 1          | 76.40  | 8.49  | 95.05 | 5.64 | 82.71  | 5.44  | 95.54  | 3.76  | 0.1        | 44.22  | 6.42 |
| 0.3        | 92.41  | 3.53  | 96.49 | 4.19 | 96.99  | 3.01  | 97.60  | 5.20  | 0.03       | 97.10  | 4.53 |
| GI50       | 2.309  | 0.060 | >30   |      | 1.971  | 0.134 | >30    |       | 0.095      | 0.005  |      |
|            |        |       |       |      |        |       |        |       |            |        |      |
| MDA-MB-231 |        |       |       |      |        |       |        |       |            |        |      |
| Conc.(uM)  | 1      |       | 2     |      | 3      |       | 4      |       | 5          |        |      |
|            | Mean   | SD    | Mean  | SD   | Mean   | SD    | Mean   | SD    | Mean       | SD     |      |
| 30         | 81.19  | 8.29  | 72.09 | 7.13 | 73.48  | 6.08  | -12.50 | 4.57  | -10.30     | 7.38   |      |
| 10         | 83.22  | 4.89  | 81.17 | 6.70 | 79.99  | 4.17  | 24.82  | 5.92  | 25.47      | 5.81   |      |
| 3          | 86.02  | 2.26  | 83.20 | 5.66 | 81.53  | 4.97  | 48.39  | 8.77  | 39.53      | 9.02   |      |
| 1          | 89.60  | 8.00  | 93.46 | 3.62 | 94.81  | 4.24  | 87.62  | 6.87  | 93.23      | 4.32   |      |
| 0.3        | 97.66  | 3.67  | 97.26 | 2.52 | 99.27  | 2.67  | 99.41  | 4.94  | 96.27      | 4.18   |      |
| GI50       | >30    |       | >30   |      | >30    |       | 3.216  | 0.151 | 2.881      | 0.392  |      |
|            |        |       |       |      |        |       |        |       |            |        |      |
| Conc.(uM)  | 6      |       | 7     |      | 8      |       | 9      |       | Adriamycin |        |      |
|            | Mean   | SD    | Mean  | SD   | Mean   | SD    | Mean   | SD    | Mean       | SD     |      |
| 30         | -10.50 | 7.67  | 77.49 | 4.20 | -7.43  | 5.87  | 79.12  | 6.46  | 3          | -12.39 | 3.45 |
| 10         | 27.33  | 5.27  | 79.99 | 5.58 | 25.97  | 8.37  | 81.53  | 6.44  | 1          | -8.27  | 4.44 |
| 3          | 35.14  | 9.69  | 83.77 | 2.36 | 37.23  | 8.00  | 86.30  | 5.87  | 0.3        | 12.23  | 2.87 |
| 1          | 88.92  | 6.57  | 95.10 | 5.67 | 88.29  | 3.60  | 92.97  | 6.17  | 0.1        | 30.05  | 6.53 |
| 0.3        | 96.99  | 4.91  | 99.27 | 6.20 | 97.11  | 3.87  | 94.07  | 3.42  | 0.03       | 91.30  | 6.07 |
| GI50       | 2.634  | 0.153 | >30   |      | 2.712  | 0.101 | >30    |       | 0.073      | 0.009  |      |

**HCT-15**

| Conc.(uM) | 1     |      | 2     |      | 3     |      | 4     |       | 5      |       |
|-----------|-------|------|-------|------|-------|------|-------|-------|--------|-------|
|           | Mean  | SD   | Mean  | SD   | Mean  | SD   | Mean  | SD    | Mean   | SD    |
| 30        | 75.22 | 5.13 | 78.99 | 2.23 | 78.41 | 2.59 | -9.93 | 2.66  | -14.13 | 5.87  |
| 10        | 79.63 | 6.81 | 83.45 | 4.03 | 82.41 | 7.90 | 22.07 | 7.66  | 21.64  | 3.61  |
| 3         | 85.37 | 5.69 | 85.04 | 2.84 | 89.77 | 2.08 | 46.36 | 2.88  | 35.99  | 4.76  |
| 1         | 91.41 | 3.60 | 93.16 | 7.06 | 91.90 | 3.87 | 91.65 | 5.11  | 86.34  | 3.05  |
| 0.3       | 94.66 | 3.07 | 95.56 | 1.44 | 93.45 | 4.22 | 95.34 | 3.59  | 92.74  | 4.53  |
| GI50      | >30   |      | >30   |      | >30   |      | 3.115 | 0.017 | 2.458  | 0.349 |

|           | 6     |       | 7     |      | 8      |       | 9     |      |      | Adriamycin |       |
|-----------|-------|-------|-------|------|--------|-------|-------|------|------|------------|-------|
| Conc.(uM) | Mean  | SD    | Mean  | SD   | Mean   | SD    | Mean  | SD   |      | Mean       | SD    |
| 30        | -4.90 | 4.06  | 81.42 | 3.53 | -13.19 | 7.77  | 70.39 | 2.95 | 3    | -13.69     | 3.13  |
| 10        | 25.15 | 6.52  | 85.08 | 1.29 | 28.71  | 3.67  | 73.27 | 3.77 | 1    | -5.25      | 4.38  |
| 3         | 29.70 | 5.22  | 87.83 | 3.41 | 47.25  | 7.44  | 78.95 | 3.74 | 0.3  | 13.77      | 5.34  |
| 1         | 88.47 | 4.33  | 91.85 | 2.63 | 87.29  | 4.99  | 90.15 | 7.52 | 0.1  | 34.67      | 4.26  |
| 0.3       | 93.84 | 3.97  | 98.98 | 2.73 | 94.25  | 3.96  | 95.51 | 2.51 | 0.03 | 94.62      | 7.61  |
| GI50      | 2.346 | 0.106 | >30   |      | 3.233  | 0.122 | >30   |      |      | 0.080      | 0.007 |

**PC-3**

| Conc.(uM) | 1     |      | 2     |      | 3     |      | 4      |       | 5     |       |
|-----------|-------|------|-------|------|-------|------|--------|-------|-------|-------|
|           | Mean  | SD   | Mean  | SD   | Mean  | SD   | Mean   | SD    | Mean  | SD    |
| 30        | 84.93 | 3.15 | 72.30 | 5.51 | 82.88 | 1.55 | -12.50 | 5.51  | -7.53 | 8.94  |
| 10        | 87.14 | 4.46 | 78.41 | 2.61 | 84.31 | 3.75 | 23.38  | 5.68  | 24.11 | 4.35  |
| 3         | 88.60 | 5.71 | 87.30 | 3.00 | 89.37 | 3.72 | 40.99  | 3.59  | 52.64 | 2.76  |
| 1         | 94.72 | 2.10 | 93.38 | 4.97 | 94.25 | 4.25 | 93.38  | 1.74  | 87.00 | 4.84  |
| 0.3       | 99.45 | 1.21 | 96.67 | 3.49 | 99.19 | 3.03 | 96.28  | 1.08  | 96.87 | 4.22  |
| GI50      | >30   |      | >30   |      | >30   |      | 2.881  | 0.059 | 3.456 | 0.028 |

| Conc.(uM) | 6     |       | 7     |      | 8     |       | 9     |      | Adriamycin |        |       |
|-----------|-------|-------|-------|------|-------|-------|-------|------|------------|--------|-------|
|           | Mean  | SD    | Mean  | SD   | Mean  | SD    | Mean  | SD   | Mean       | SD     |       |
| 30        | -5.34 | 4.17  | 80.62 | 7.20 | -5.68 | 7.86  | 81.49 | 4.94 | 3          | -11.65 | 4.66  |
| 10        | 20.57 | 6.68  | 85.78 | 5.48 | 24.60 | 3.92  | 82.34 | 7.30 | 1          | -6.62  | 7.00  |
| 3         | 43.24 | 5.02  | 87.91 | 6.76 | 45.51 | 5.62  | 89.68 | 2.86 | 0.3        | 17.99  | 7.19  |
| 1         | 90.56 | 3.71  | 93.53 | 5.05 | 93.51 | 2.55  | 93.11 | 4.82 | 0.1        | 35.47  | 4.32  |
| 0.3       | 97.58 | 3.53  | 99.79 | 1.99 | 98.86 | 3.21  | 99.34 | 2.97 | 0.03       | 96.53  | 5.36  |
| GI50      | 2.922 | 0.197 | >30   |      | 3.236 | 0.582 | >30   |      |            | 0.084  | 0.010 |

| NUGC-3    |       |       |       |      |        |       |        |       |            |       |
|-----------|-------|-------|-------|------|--------|-------|--------|-------|------------|-------|
| Conc.(uM) | 1     |       | 2     |      | 3      |       | 4      |       | 5          |       |
|           | Mean  | SD    | Mean  | SD   | Mean   | SD    | Mean   | SD    | Mean       | SD    |
| 30        | 77.48 | 6.44  | 76.40 | 2.31 | 78.43  | 8.75  | -20.18 | 3.09  | -12.07     | 5.27  |
| 10        | 87.27 | 6.11  | 80.23 | 7.66 | 82.62  | 6.42  | 11.36  | 7.08  | 14.67      | 7.66  |
| 3         | 89.23 | 6.61  | 87.05 | 2.36 | 91.68  | 6.55  | 31.07  | 4.88  | 31.60      | 6.31  |
| 1         | 90.78 | 2.03  | 91.02 | 4.65 | 96.18  | 2.97  | 89.63  | 2.92  | 95.52      | 9.72  |
| 0.3       | 95.57 | 2.20  | 94.27 | 5.31 | 99.28  | 7.63  | 96.09  | 2.58  | 98.86      | 4.19  |
| GI50      | >30   |       | >30   |      | >30    |       | 2.234  | 0.135 | 2.368      | 0.383 |
| Conc.(uM) | 6     |       | 7     |      | 8      |       | 9      |       | Adriamycin |       |
|           | Mean  | SD    | Mean  | SD   | Mean   | SD    | Mean   | SD    | Mean       | SD    |
| 30        | -8.42 | 2.55  | 82.57 | 4.81 | -18.34 | 7.00  | 70.81  | 5.07  | 3-15.59    | 7.40  |
| 10        | 13.07 | 7.03  | 85.95 | 4.77 | 15.04  | 8.53  | 72.09  | 3.98  | 1-2.55     | 4.67  |
| 3         | 35.22 | 4.33  | 88.30 | 4.96 | 25.34  | 7.95  | 82.43  | 5.71  | 0.3-28.07  | 7.70  |
| 1         | 91.03 | 4.65  | 92.07 | 5.70 | 84.31  | 8.88  | 86.34  | 3.74  | 0.1-35.49  | 5.15  |
| 0.3       | 96.40 | 4.95  | 96.76 | 2.18 | 93.01  | 5.49  | 93.12  | 7.63  | 0.03-97.02 | 6.10  |
| GI50      | 2.409 | 0.089 | >30   |      | 1.967  | 0.440 | >30    |       | 0.092      | 0.023 |
| NCI-H23   |       |       |       |      |        |       |        |       |            |       |
| Conc.(uM) | 1     |       | 2     |      | 3      |       | 4      |       | 5          |       |
|           | Mean  | SD    | Mean  | SD   | Mean   | SD    | Mean   | SD    | Mean       | SD    |
| 30        | 76.80 | 4.89  | 73.14 | 4.54 | 73.85  | 0.96  | -14.64 | 9.83  | -8.90      | 6.07  |
| 10        | 81.76 | 7.02  | 79.10 | 5.11 | 76.12  | 8.47  | 28.14  | 7.29  | 16.77      | 8.70  |
| 3         | 85.83 | 2.86  | 86.06 | 3.19 | 80.37  | 2.28  | 36.22  | 8.83  | 43.09      | 9.58  |
| 1         | 89.55 | 3.71  | 92.21 | 6.06 | 88.42  | 4.70  | 86.38  | 5.09  | 87.61      | 8.02  |
| 0.3       | 97.25 | 4.84  | 93.73 | 2.38 | 93.40  | 2.32  | 92.56  | 6.87  | 93.49      | 4.00  |
| GI50      | >30   |       | >30   |      | >30    |       | 2.604  | 0.017 | 2.734      | 0.349 |
| Conc.(uM) | 6     |       | 7     |      | 8      |       | 9      |       | Adriamycin |       |
|           | Mean  | SD    | Mean  | SD   | Mean   | SD    | Mean   | SD    | Mean       | SD    |
| 30        | -9.09 | 8.98  | 76.29 | 9.64 | -16.11 | 3.14  | 80.30  | 2.67  | 3-12.52    | 5.33  |
| 10        | 19.19 | 5.88  | 79.37 | 5.42 | 26.41  | 6.72  | 84.03  | 6.10  | 1-9.96     | 4.52  |
| 3         | 41.82 | 5.56  | 83.43 | 5.24 | 31.14  | 8.27  | 86.21  | 7.76  | 0.3-17.71  | 6.52  |
| 1         | 88.79 | 7.43  | 89.94 | 9.52 | 90.31  | 3.09  | 87.18  | 5.35  | 0.1-25.15  | 8.75  |
| 0.3       | 94.67 | 2.52  | 93.73 | 7.45 | 95.45  | 1.71  | 98.14  | 1.61  | 0.03-93.70 | 4.84  |
| GI50      | 2.753 | 0.106 | >30   |      | 2.401  | 0.122 | >30    |       | 0.070      | 0.007 |

**Figure S35.** Results of the cytotoxicity test of **1-9** against six solid cancer cell lines.

| <b>1</b>   | HL-60 |     | Raji |     | K562 |     | RPMI-8402 |     | NALM6 |     | U266 |     | WSU-DLCL2 |     |
|------------|-------|-----|------|-----|------|-----|-----------|-----|-------|-----|------|-----|-----------|-----|
| ( $\mu$ M) | MEAN  | SD  | MEAN | SD  | MEAN | SD  | MEAN      | SD  | MEAN  | SD  | MEAN | SD  | MEAN      | SD  |
| 30         | 91.3  | 2.7 | 90.7 | 3.3 | 64.4 | 2.1 | 69.5      | 3.6 | 76.6  | 3.9 | 93.5 | 4.9 | 103.1     | 3.9 |
| 10         | 96.9  | 2.6 | 98.4 | 6.6 | 82.1 | 2.9 | 79.8      | 4.8 | 94.5  | 6.8 | 91.6 | 6.9 | 107.1     | 4.9 |
| 3          | 99.9  | 4.7 | 93.8 | 7.2 | 90.4 | 6.4 | 91.2      | 3.8 | 99.7  | 4.0 | 88.8 | 3.0 | 112.5     | 2.4 |
| 1          | 94.2  | 5.2 | 96.6 | 4.3 | 94.6 | 4.5 | 86.3      | 5.4 | 103.7 | 3.7 | 86.5 | 3.2 | 111.6     | 5.5 |
| 0.3        | 91.8  | 3.5 | 95.3 | 5.9 | 91.7 | 3.4 | 90.7      | 4.6 | 100.5 | 4.5 | 82.0 | 4.3 | 101.6     | 6.2 |
| IC50       | >30   |     | >30  |     | >30  |     | >30       |     | >30   |     | >30  |     | >30       |     |

| <b>2</b>   | HL-60 |     | Raji  |     | K562  |     | RPMI-8402 |     | NALM6 |     | U266  |     | WSU-DLCL2 |     |
|------------|-------|-----|-------|-----|-------|-----|-----------|-----|-------|-----|-------|-----|-----------|-----|
| ( $\mu$ M) | MEAN  | SD  | MEAN  | SD  | MEAN  | SD  | MEAN      | SD  | MEAN  | SD  | MEAN  | SD  | MEAN      | SD  |
| 30         | 99.0  | 2.2 | 99.7  | 3.0 | 82.6  | 3.8 | 93.2      | 5.4 | 94.8  | 3.3 | 92.5  | 7.1 | 87.7      | 2.2 |
| 10         | 94.3  | 2.9 | 103.0 | 3.6 | 85.4  | 2.0 | 93.5      | 6.5 | 98.4  | 3.9 | 90.2  | 6.1 | 94.3      | 3.2 |
| 3          | 94.0  | 4.2 | 105.4 | 4.4 | 89.6  | 4.4 | 99.2      | 4.6 | 103.6 | 6.3 | 96.1  | 6.8 | 98.0      | 3.6 |
| 1          | 95.8  | 2.4 | 106.5 | 4.0 | 97.5  | 7.3 | 96.3      | 3.2 | 108.7 | 2.9 | 99.5  | 7.5 | 103.0     | 4.6 |
| 0.3        | 92.1  | 2.7 | 102.7 | 3.5 | 103.2 | 4.9 | 97.8      | 5.1 | 113.8 | 4.8 | 101.1 | 8.7 | 103.7     | 4.5 |
| IC50       | >30   |     | >30   |     | >30   |     | >30       |     | >30   |     | >30   |     | >30       |     |

| <b>3</b>   | HL-60 |      | Raji |     | K562  |     | RPMI-8402 |     | NALM6 |     | U266 |     | WSU-DLCL2 |     |
|------------|-------|------|------|-----|-------|-----|-----------|-----|-------|-----|------|-----|-----------|-----|
| ( $\mu$ M) | MEAN  | SD   | MEAN | SD  | MEAN  | SD  | MEAN      | SD  | MEAN  | SD  | MEAN | SD  | MEAN      | SD  |
| 30         | 8.5   | 0.6  | 87.4 | 3.9 | 71.8  | 5.6 | 70.5      | 2.8 | 69.6  | 6.6 | 86.2 | 6.5 | 95.9      | 1.2 |
| 10         | 87.4  | 10.4 | 98.6 | 3.6 | 91.0  | 3.2 | 91.9      | 2.3 | 88.4  | 6.4 | 87.5 | 7.2 | 107.0     | 3.0 |
| 3          | 104.7 | 10.3 | 99.9 | 2.9 | 100.9 | 3.9 | 94.7      | 3.0 | 88.9  | 8.2 | 94.8 | 3.1 | 105.4     | 2.8 |
| 1          | 103.4 | 6.7  | 98.8 | 1.2 | 101.0 | 3.2 | 99.3      | 2.4 | 86.6  | 5.9 | 90.9 | 5.1 | 106.5     | 5.6 |
| 0.3        | 106.1 | 10.2 | 97.3 | 2.4 | 104.3 | 4.7 | 92.5      | 6.6 | 86.2  | 9.4 | 81.7 | 9.1 | 105.9     | 2.8 |
| IC50       | 16.39 | 2.38 | >30  |     | >30   |     | >30       |     | >30   |     | >30  |     | >30       |     |



| <b>4</b>   | HL-60 |     | Raji  |     | K562  |      | RPMI-8402 |      | NALM6 |      | U266  |     | WSU-DLCL2 |     |
|------------|-------|-----|-------|-----|-------|------|-----------|------|-------|------|-------|-----|-----------|-----|
| ( $\mu$ M) | MEAN  | SD  | MEAN  | SD  | MEAN  | SD   | MEAN      | SD   | MEAN  | SD   | MEAN  | SD  | MEAN      | SD  |
| 30         | 94.9  | 2.4 | 82.6  | 8.4 | 36.0  | 1.1  | 38.1      | 1.1  | 9.7   | 1.8  | 99.1  | 2.7 | 69.1      | 5.7 |
| 10         | 94.9  | 2.9 | 120.3 | 7.8 | 109.7 | 5.0  | 97.6      | 2.7  | 92.1  | 7.1  | 104.9 | 1.6 | 105.6     | 0.9 |
| 3          | 91.3  | 4.3 | 105.7 | 4.4 | 109.5 | 6.2  | 96.3      | 2.2  | 84.8  | 8.3  | 102.9 | 6.6 | 104.4     | 2.8 |
| 1          | 94.3  | 1.0 | 102.7 | 5.7 | 112.8 | 6.1  | 91.6      | 1.5  | 92.2  | 3.5  | 105.1 | 3.1 | 93.2      | 2.8 |
| 0.3        | 92.0  | 4.0 | 98.0  | 5.5 | 113.9 | 3.8  | 92.4      | 2.6  | 85.2  | 5.5  | 108.5 | 6.5 | 84.5      | 2.9 |
| IC50       | >30   |     | >30   |     | 28.23 | 0.85 | 26.39     | 0.63 | 17.75 | 1.73 | >30   |     | >30       |     |

| <b>5</b>   | HL-60 |     | Raji |     | K562  |     | RPMI-8402 |     | NALM6 |      | U266  |     | WSU-DLCL2 |     |
|------------|-------|-----|------|-----|-------|-----|-----------|-----|-------|------|-------|-----|-----------|-----|
| ( $\mu$ M) | MEAN  | SD  | MEAN | SD  | MEAN  | SD  | MEAN      | SD  | MEAN  | SD   | MEAN  | SD  | MEAN      | SD  |
| 30         | 85.4  | 8.0 | 94.0 | 3.0 | 77.0  | 1.8 | 83.2      | 1.6 | 88.3  | 10.8 | 93.5  | 5.9 | 104.7     | 5.8 |
| 10         | 93.3  | 8.2 | 98.9 | 4.1 | 88.0  | 2.8 | 95.1      | 2.0 | 104.3 | 3.8  | 98.5  | 1.9 | 106.8     | 5.4 |
| 3          | 95.1  | 7.1 | 98.9 | 2.0 | 94.7  | 6.3 | 107.9     | 3.3 | 112.9 | 6.3  | 100.2 | 8.8 | 104.0     | 3.3 |
| 1          | 90.7  | 9.0 | 99.4 | 2.4 | 100.5 | 5.8 | 108.1     | 1.0 | 107.1 | 3.4  | 104.3 | 8.2 | 103.3     | 1.9 |
| 0.3        | 96.2  | 8.3 | 94.0 | 3.0 | 107.5 | 6.8 | 104.0     | 5.0 | 112.1 | 6.6  | 105.7 | 5.8 | 98.6      | 2.3 |
| IC50       | >30   |     | >30  |     | >30   |     | >30       |     | >30   |      | >30   |     | >30       |     |

| <b>6</b>   | HL-60 |      | Raji  |      | K562  |      | RPMI-8402 |      | NALM6 |      | U266 |      | WSU-DLCL2 |      |
|------------|-------|------|-------|------|-------|------|-----------|------|-------|------|------|------|-----------|------|
| ( $\mu$ M) | MEAN  | SD   | MEAN  | SD   | MEAN  | SD   | MEAN      | SD   | MEAN  | SD   | MEAN | SD   | MEAN      | SD   |
| 30         | 20.2  | 4.1  | 10.3  | 0.8  | 10.2  | 0.2  | 13.1      | 1.0  | 0.9   | 0.2  | 67.6 | 1.8  | 0.5       | 0.1  |
| 10         | 98.1  | 1.9  | 99.2  | 3.4  | 32.7  | 1.2  | 41.6      | 1.5  | 56.3  | 6.0  | 99.7 | 7.2  | 91.4      | 4.9  |
| 3          | 100.2 | 3.9  | 108.0 | 2.5  | 101.5 | 1.5  | 92.8      | 5.1  | 97.7  | 4.4  | 95.1 | 6.5  | 104.2     | 3.4  |
| 1          | 98.0  | 4.9  | 105.1 | 2.2  | 102.4 | 3.7  | 91.9      | 3.5  | 105.9 | 4.5  | 89.6 | 5.3  | 106.5     | 3.1  |
| 0.3        | 92.6  | 7.2  | 106.1 | 6.1  | 98.4  | 4.1  | 90.4      | 5.0  | 107.0 | 4.6  | 96.1 | 11.2 | 102.2     | 2.8  |
| IC50       | 22.58 | 0.74 | 21.30 | 3.88 | 8.37  | 0.26 | 8.85      | 0.43 | 10.65 | 0.74 | >30  |      | 14.03     | 1.17 |

| 7          | HL-60 |     | Raji  |     | K562  |     | RPMI-8402 |     | NALM6 |     | U266  |     | WSU-DLCL2 |     |
|------------|-------|-----|-------|-----|-------|-----|-----------|-----|-------|-----|-------|-----|-----------|-----|
| ( $\mu$ M) | MEAN  | SD  | MEAN  | SD  | MEAN  | SD  | MEAN      | SD  | MEAN  | SD  | MEAN  | SD  | MEAN      | SD  |
| 30         | 98.7  | 3.9 | 120.4 | 3.0 | 98.6  | 5.0 | 100.2     | 2.3 | 88.9  | 4.3 | 99.5  | 4.2 | 107.9     | 2.6 |
| 10         | 98.3  | 4.6 | 111.9 | 2.2 | 106.8 | 7.9 | 97.5      | 2.4 | 96.7  | 4.8 | 101.8 | 5.2 | 108.9     | 2.5 |
| 3          | 90.8  | 2.2 | 111.7 | 4.0 | 98.3  | 8.5 | 96.9      | 4.0 | 87.1  | 7.5 | 103.2 | 2.5 | 105.7     | 2.8 |
| 1          | 96.1  | 3.5 | 109.3 | 7.9 | 100.8 | 9.8 | 90.9      | 5.1 | 97.6  | 4.0 | 103.1 | 2.9 | 94.6      | 6.9 |
| 0.3        | 91.6  | 2.3 | 101.1 | 8.0 | 102.8 | 6.0 | 88.0      | 4.9 | 99.9  | 5.8 | 101.5 | 6.9 | 87.1      | 6.9 |
| IC50       | >30   |     | >30   |     | >30   |     | >30       |     | >30   |     | >30   |     | >30       |     |

| 8          | HL-60 |     | Raji |     | K562  |      | RPMI-8402 |      | NALM6 |      | U266  |     | WSU-DLCL2 |      |
|------------|-------|-----|------|-----|-------|------|-----------|------|-------|------|-------|-----|-----------|------|
| ( $\mu$ M) | MEAN  | SD  | MEAN | SD  | MEAN  | SD   | MEAN      | SD   | MEAN  | SD   | MEAN  | SD  | MEAN      | SD   |
| 30         | 83.6  | 4.5 | 52.8 | 2.0 | 17.7  | 3.9  | 27.4      | 1.6  | 8.7   | 0.4  | 90.6  | 3.0 | 36.8      | 8.4  |
| 10         | 93.1  | 3.8 | 98.3 | 3.9 | 85.1  | 0.7  | 99.5      | 5.9  | 109.3 | 7.5  | 103.9 | 9.3 | 100.5     | 6.2  |
| 3          | 93.4  | 3.6 | 98.1 | 3.7 | 100.5 | 5.0  | 107.4     | 6.3  | 93.7  | 3.2  | 101.4 | 4.5 | 97.5      | 4.6  |
| 1          | 92.5  | 3.0 | 95.7 | 4.8 | 99.2  | 6.6  | 105.4     | 6.5  | 93.9  | 10.6 | 100.7 | 6.4 | 98.9      | 2.7  |
| 0.3        | 93.7  | 1.1 | 94.3 | 4.4 | 102.0 | 3.5  | 106.2     | 4.6  | 96.8  | 7.7  | 97.1  | 7.4 | 100.1     | 1.2  |
| IC50       | >30   |     | >30  |     | 17.94 | 1.05 | 25.37     | 2.90 | 24.77 | 1.22 | >30   |     | 28.26     | 3.45 |

| 9          | HL-60 |     | Raji  |      | K562  |      | RPMI-8402 |     | NALM6 |      | U266 |     | WSU-DLCL2 |     |
|------------|-------|-----|-------|------|-------|------|-----------|-----|-------|------|------|-----|-----------|-----|
| ( $\mu$ M) | MEAN  | SD  | MEAN  | SD   | MEAN  | SD   | MEAN      | SD  | MEAN  | SD   | MEAN | SD  | MEAN      | SD  |
| 30         | 94.6  | 2.6 | 108.5 | 11.6 | 91.8  | 2.8  | 88.2      | 5.4 | 89.1  | 3.2  | 97.8 | 6.3 | 94.2      | 2.7 |
| 10         | 92.6  | 6.6 | 112.0 | 13.7 | 96.6  | 10.1 | 86.6      | 4.2 | 93.6  | 1.8  | 96.5 | 6.2 | 105.5     | 3.7 |
| 3          | 95.5  | 5.4 | 110.2 | 8.0  | 101.8 | 7.9  | 90.2      | 5.9 | 117.1 | 7.1  | 89.0 | 7.5 | 113.5     | 2.4 |
| 1          | 99.3  | 4.9 | 94.2  | 9.2  | 100.6 | 7.5  | 89.9      | 2.1 | 128.9 | 13.9 | 89.1 | 5.4 | 104.5     | 8.0 |
| 0.3        | 96.7  | 6.1 | 89.4  | 11.8 | 96.0  | 6.4  | 92.8      | 5.2 | 97.6  | 1.0  | 81.1 | 2.5 | 94.1      | 8.7 |
| IC50       | >30   |     | >30   |      | >30   |      | >30       |     | >30   |      | >30  |     | >30       |     |

| Doxorubicin HCl | HL-60  |        | Raji   |        | K-562  |        | RPMI-8402 |        | NALM6  |        | U266   |        | WSU-DLCL2 |        |
|-----------------|--------|--------|--------|--------|--------|--------|-----------|--------|--------|--------|--------|--------|-----------|--------|
| ( $\mu$ M)      | MEAN   | SD     | MEAN   | SD     | MEAN   | SD     | MEAN      | SD     | MEAN   | SD     | MEAN   | SD     | MEAN      | SD     |
| 1               | 0.1    | 0.1    | 0.6    | 0.1    | 5.8    | 0.6    | 2.0       | 0.2    | 1.1    | 0.1    | 1.9    | 0.1    | 0.0       | 0.1    |
| 0.3             | 0.1    | 0.1    | 0.3    | 0.1    | 6.1    | 0.8    | 0.3       | 0.1    | 0.1    | 0.1    | 0.7    | 0.1    | 0.0       | 0.1    |
| 0.1             | 1.0    | 0.2    | 0.2    | 0.1    | 49.3   | 2.2    | 8.3       | 1.4    | 0.0    | 0.1    | 4.7    | 0.5    | 0.2       | 0.1    |
| 0.03            | 30.7   | 0.9    | 4.8    | 1.0    | 83.0   | 2.4    | 31.0      | 1.2    | -0.1   | 0.0    | 60.3   | 3.2    | 3.1       | 0.3    |
| 0.01            | 69.3   | 1.5    | 46.6   | 5.5    | 97.8   | 2.7    | 69.3      | 2.4    | 0.4    | 0.1    | 96.3   | 4.3    | 14.5      | 1.4    |
| 0.003           | 90.8   | 1.7    | 75.6   | 3.8    | 100.3  | 3.7    | 85.6      | 5.1    | 57.6   | 4.7    | 81.2   | 3.4    | 56.7      | 1.7    |
| 0.001           | 96.9   | 1.4    | 102.9  | 2.2    | 102.3  | 4.5    | 101.9     | 6.5    | 100.0  | 5.4    | 93.1   | 3.6    | 95.0      | 4.9    |
| 0.0003          | 98.8   | 1.6    | 114.0  | 4.3    | 105.3  | 8.4    | 101.6     | 3.1    | 101.4  | 5.6    | 91.6   | 7.8    | 101.1     | 6.0    |
| 0.0001          | 102.3  | 5.2    | 116.1  | 2.9    | 115.3  | 3.7    | 103.0     | 6.6    | 100.0  | 5.8    | 95.3   | 5.2    | 102.1     | 3.0    |
| IC50            | 0.0167 | 0.0010 | 0.0080 | 0.0010 | 0.0901 | 0.0020 | 0.0169    | 0.0000 | 0.0032 | 0.0000 | 0.0349 | 0.0010 | 0.0036    | 0.0000 |

**Figure S36.** Results of the cytotoxicity test of **1-9** against seven blood cancer cell lines.
